# Supplementary material for: Gene-Environment Interactions Between Per- and Polyfluoroalkyl Substances (PFAS) and Folate-Related SNPs on Birth Weight and Head Circumference: Findings from the Taiwan Birth Panel Study
Source: Research Square preprint supplement (doi:10.21203/rs.3.rs-6273014/v1), 2025-04-01
Supplement: Supplementary file 1 [file ae8a8601b7baff2a6ae57727.docx]

**Figure S1** Diagram for Study Population Selection Process

Exclude:

Twins (n=6)

No available data for birth outcomes or PFAS measurements (n=39)

Mothers-infant pairs in Taiwan Birth Panel study (n = 486)

Mothers-infant pairs in Taiwan Birth Panel study with complete data for exposure and outcomes (n = 431)

Exclude:

Participants without available genotyping data (n=90)

Participants without genotyping results (n=3)

Study population in this study

(n = 338)

**Figure S2** Directed acyclic graph


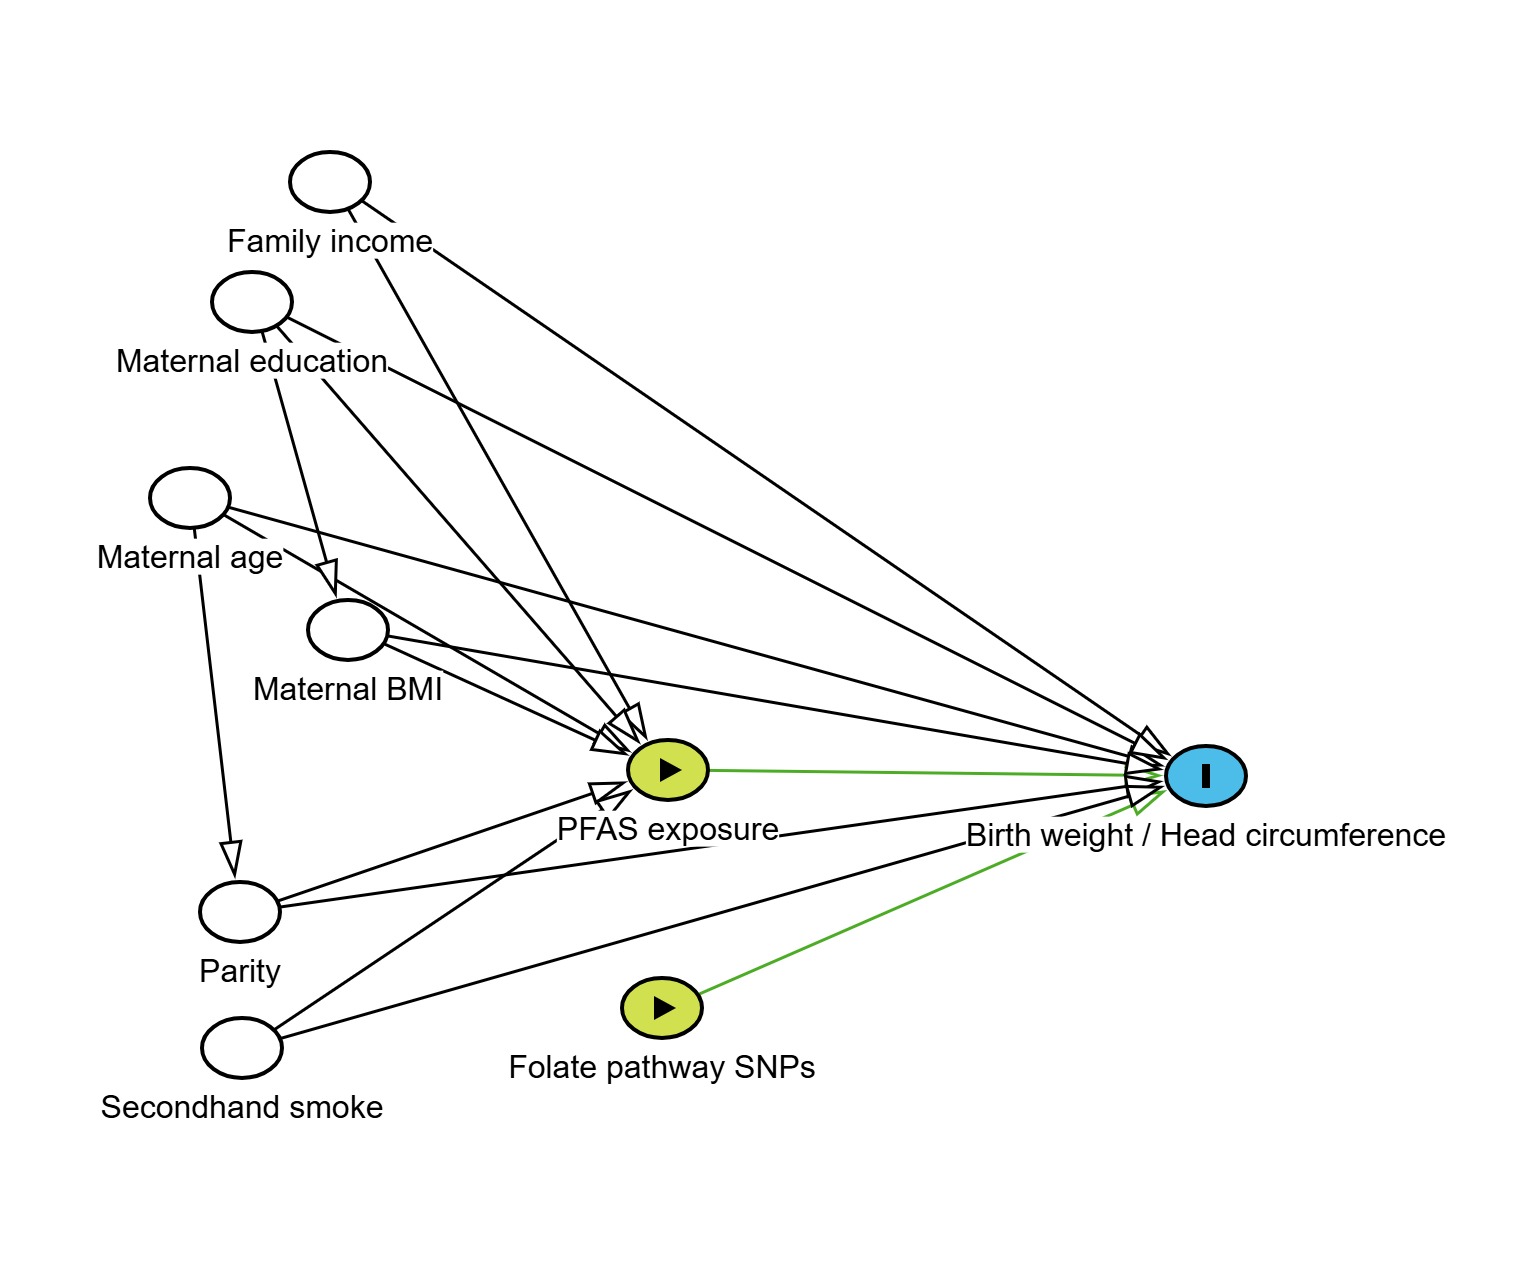


**Figure S3** Association Between PFAS Mixture with Birth Weight Across Joint Exposure Quartiles Using Quantile G-Computation

| 1. ***PFAS mixture-birth weight association*** | |
| --- | --- |
| Unadjusted | Adjusted |
| 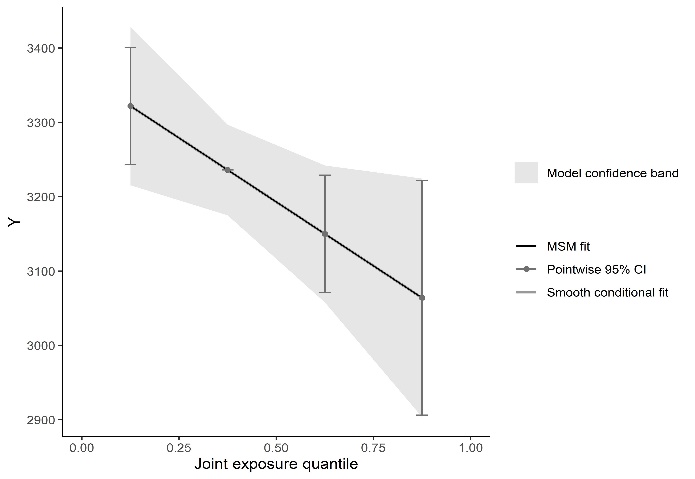 | 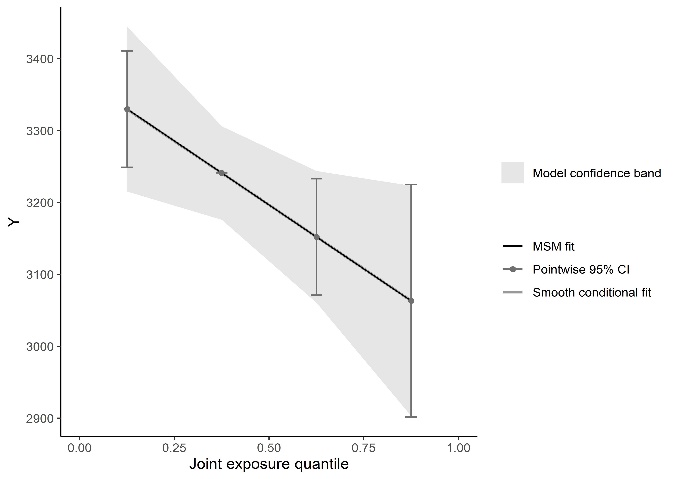 |
| 1. ***PFAS mixture-birth weight association, stratified by genotypes*** | |
| rs1801133 GG genotype | rs1801133, other genotypes (AA/AG) |
| 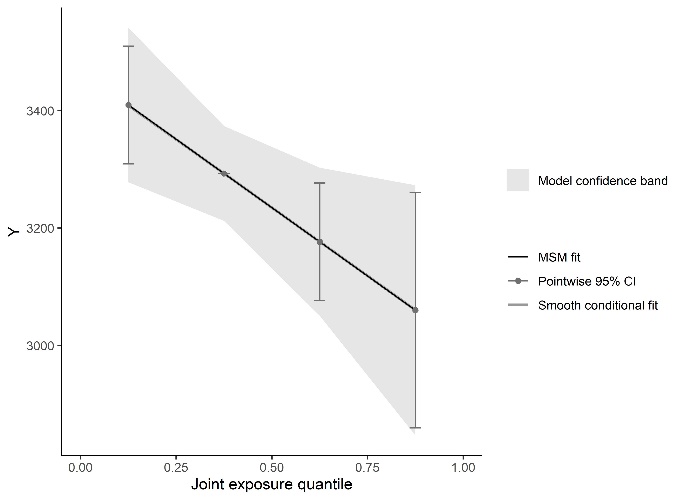 | 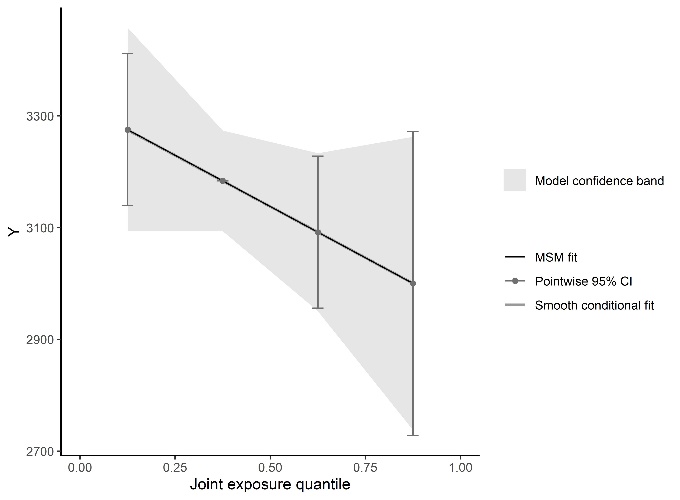 |
| rs2236225 GG genotype | rs2236225, other genotypes (AA/AG) |
| 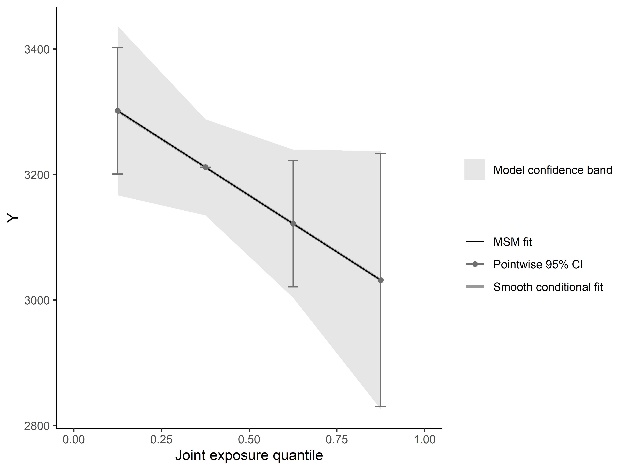 | 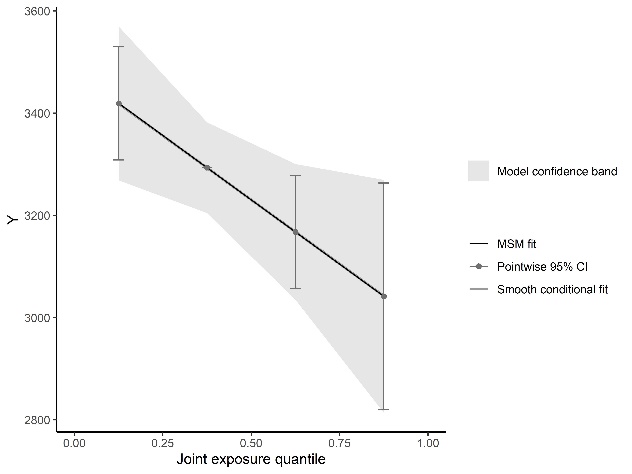 |
| rs1805087 AA genotype | rs1805087, other genotypes (AG/GG) |
| 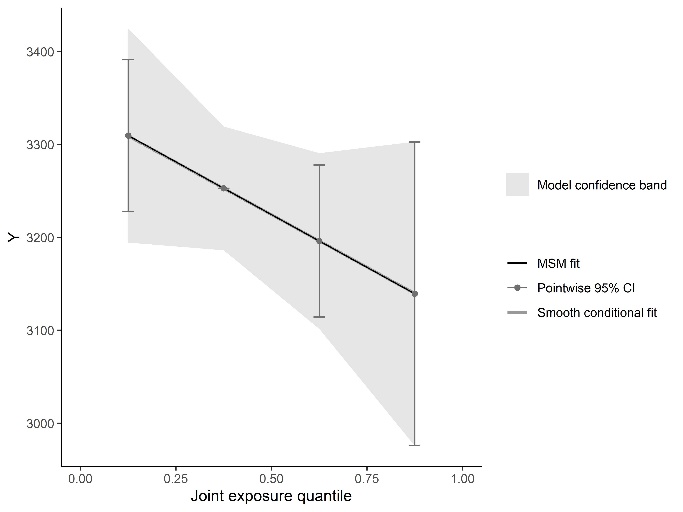 | 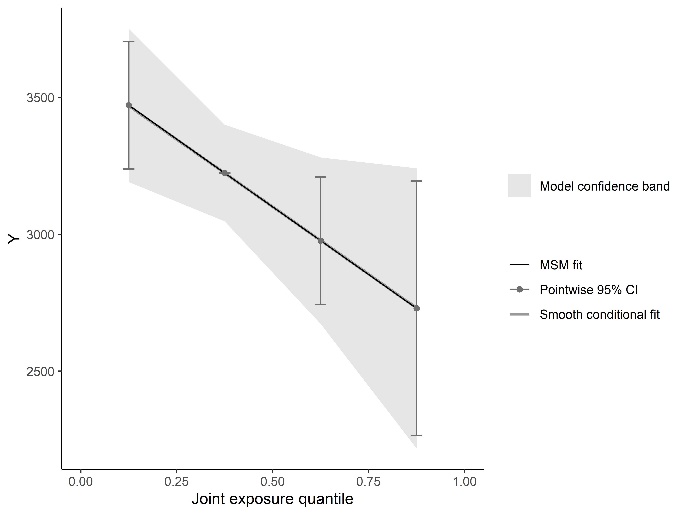 |
| rs1801394 AA genotype | rs1801394, other genotypes (AG/GG) |
| 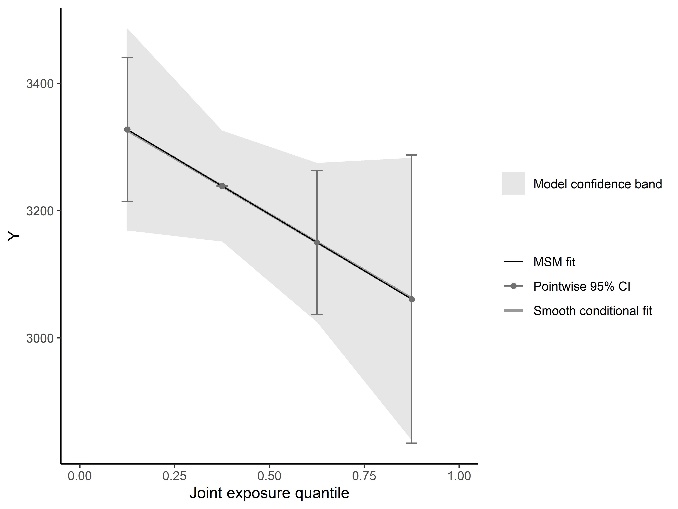 | 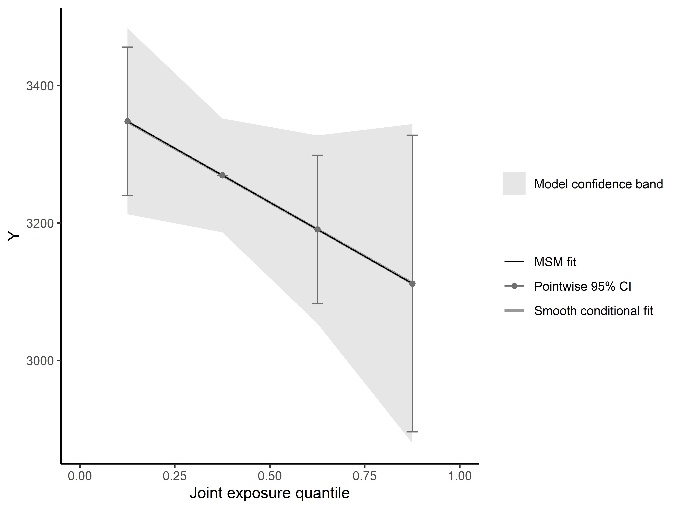 |
| rs234714 CC genotype | rs234714, other genotypes (CT/TT) |
| 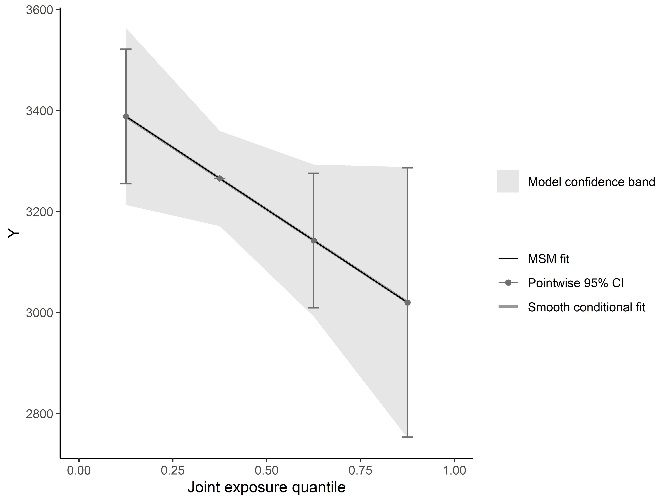 | 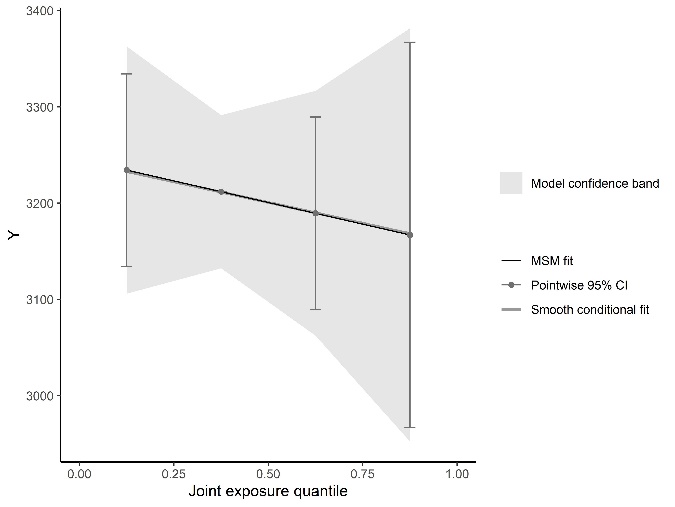 |
| rs10830963 CC genotype | rs10830963, other genotypes (CG/GG) |
| 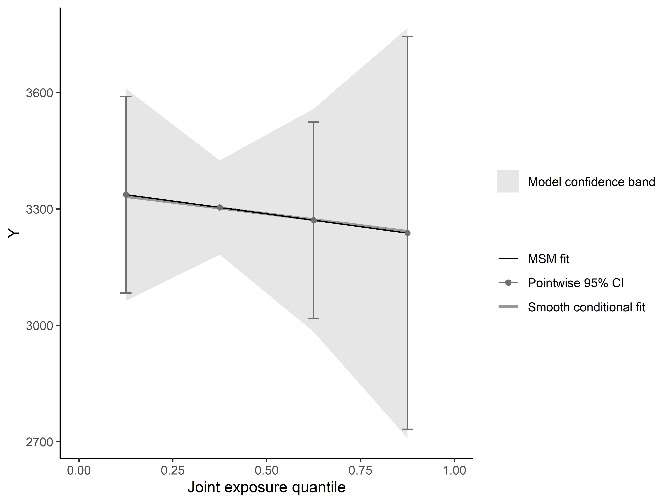 | 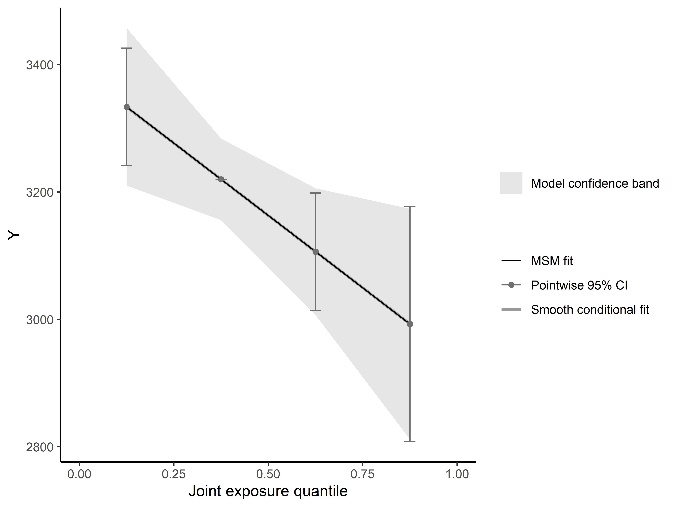 |
| rs1351394 CC genotype | rs1351394, other genotypes (CT/TT) |
| 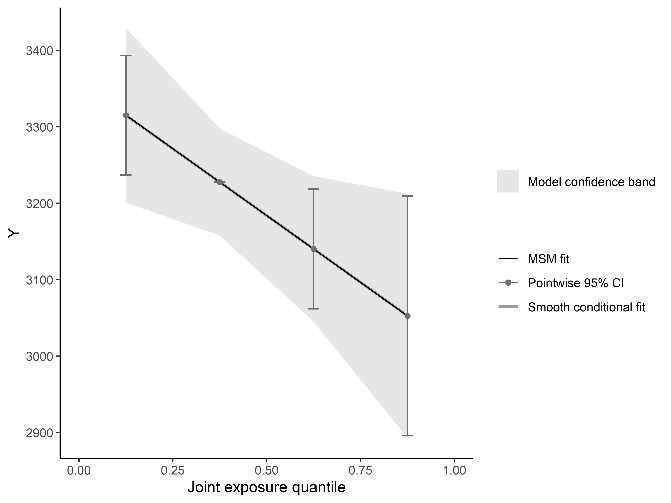 | 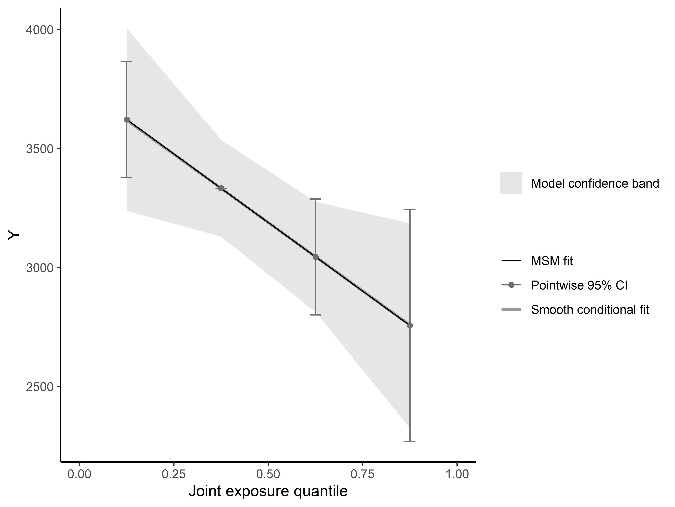 |
| rs1042725 TT genotype | rs1042725, other genotypes (CC/CT) |
| 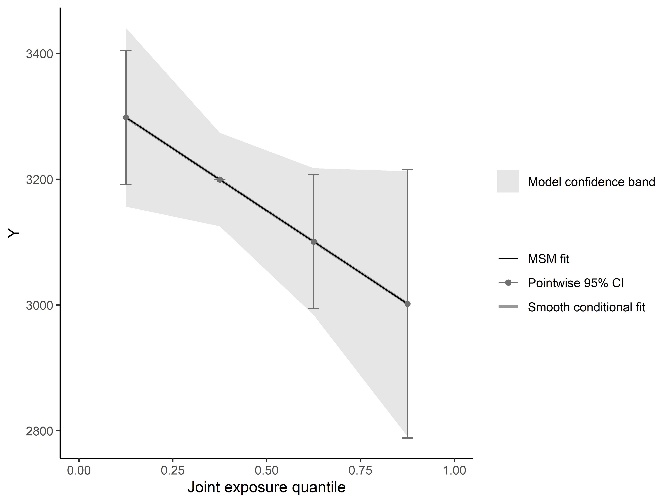 | 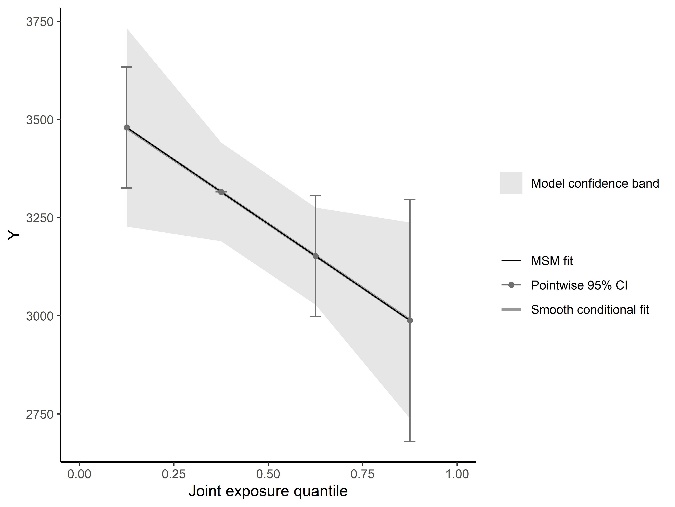 |

**Figure S4** Genotype-Stratified Non-linear Associations Between Individual PFAS Level and Birth Weight

| rs1801133 GG genotype | rs1801133, other genotypes |
| --- | --- |
| 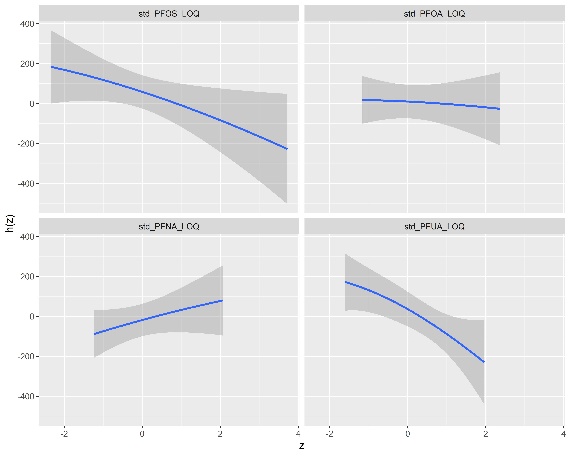 | 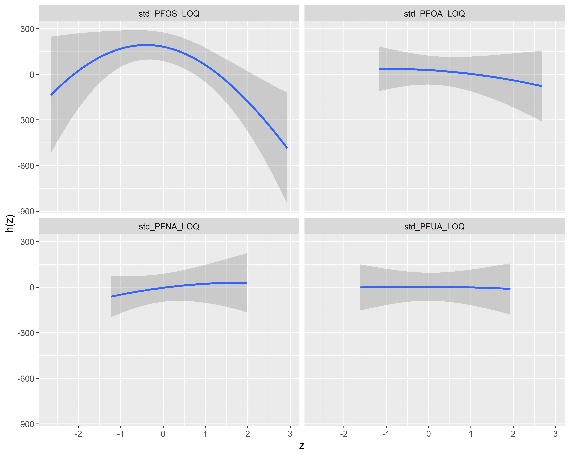 |
| rs2236225 GG genotype | rs2236225, other genotypes |
| 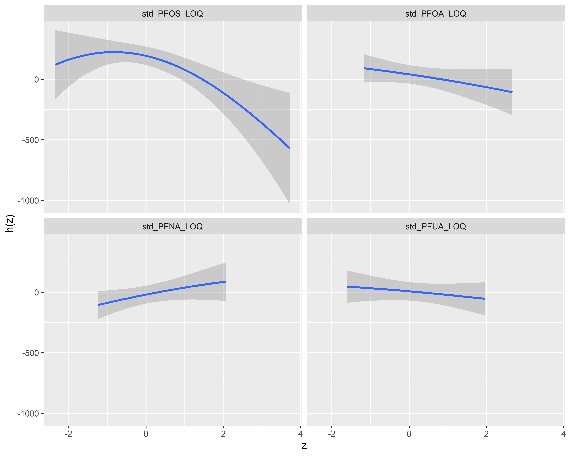 | 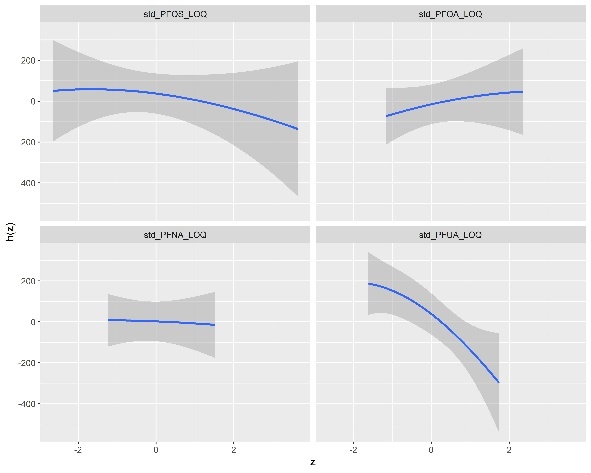 |
| rs1805087 AA genotype | rs1805087, other genotypes |
| 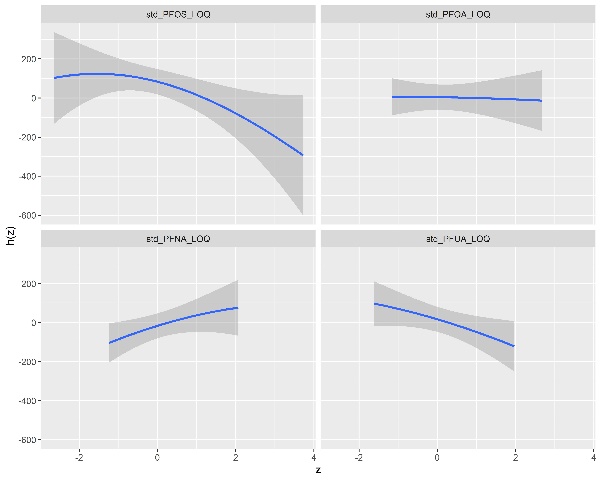 | 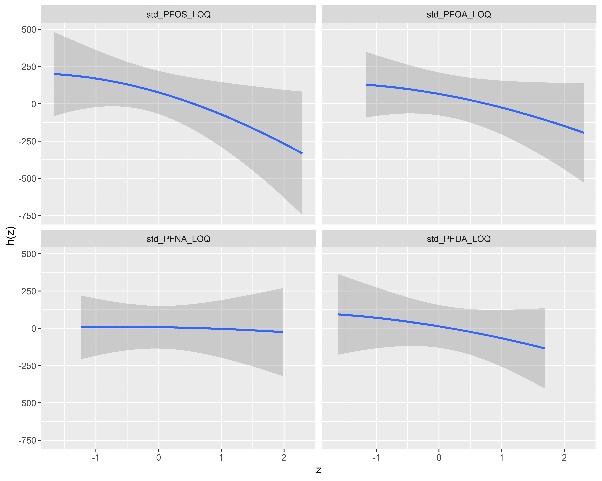 |
| rs1801394 AA genotype | rs1801394, other genotypes |
| 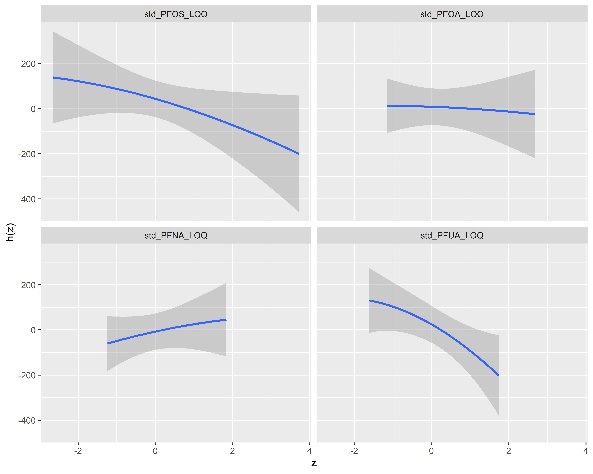 | 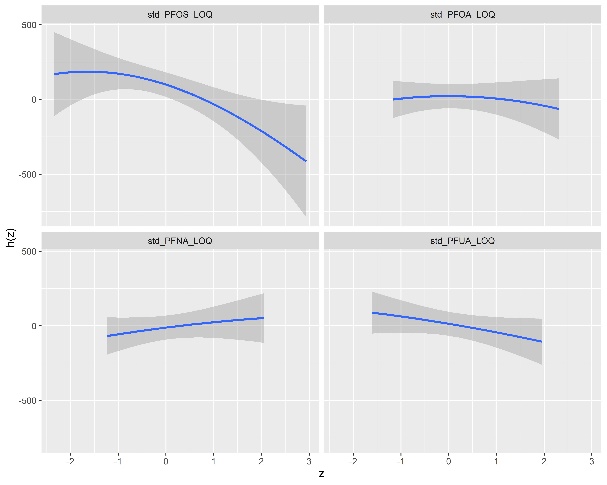 |
| rs234714 CC genotype | rs234714, other genotypes |
| 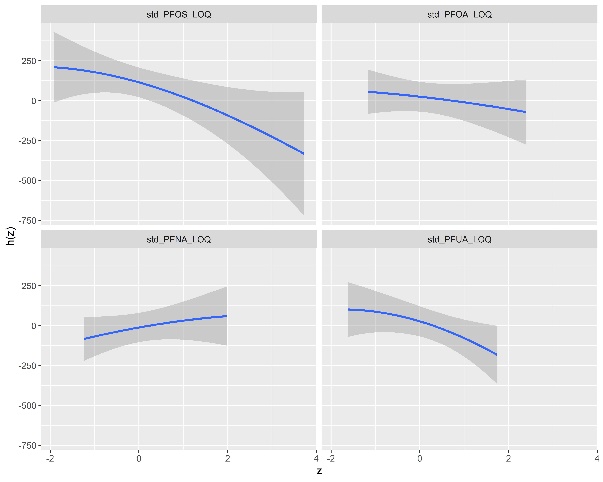 | 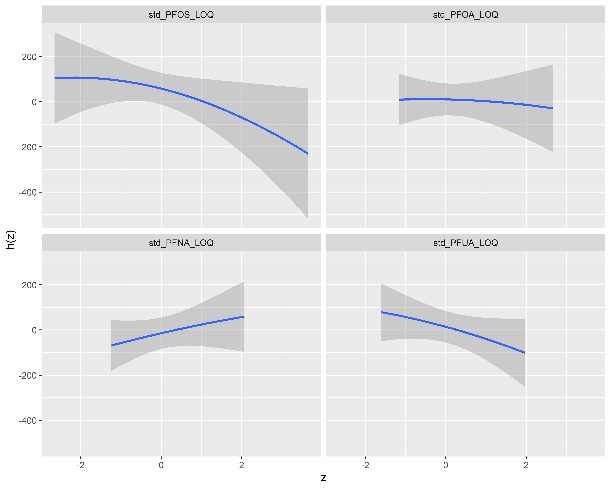 |
| rs10830963 CC genotype | rs10830963, other genotypes |
| 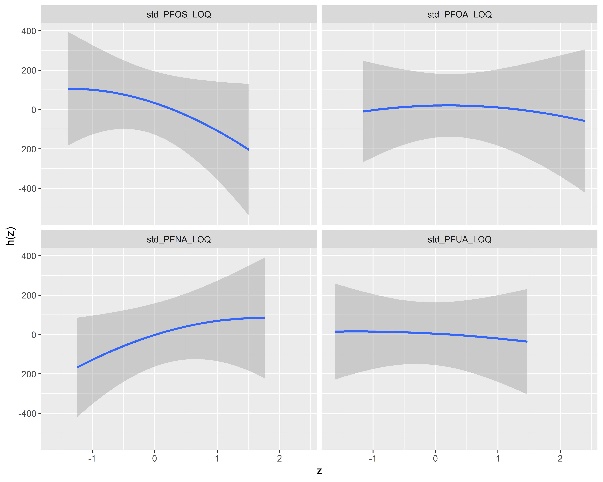 | 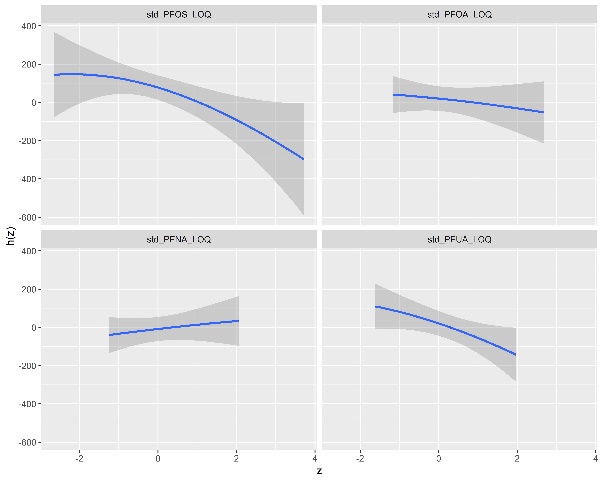 |
| rs1351394 CC genotype | rs1351394, other genotypes |
| 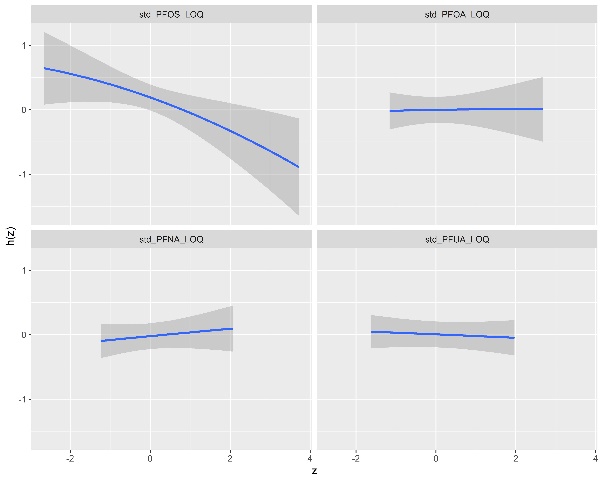 | 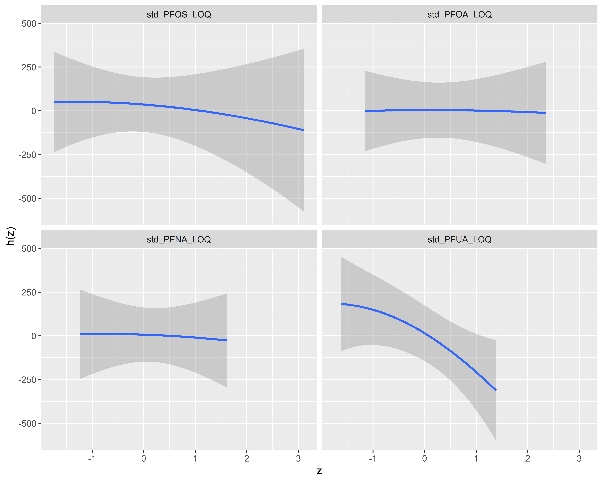 |
| rs1042725 TT genotype | rs1042725, other genotypes |
| 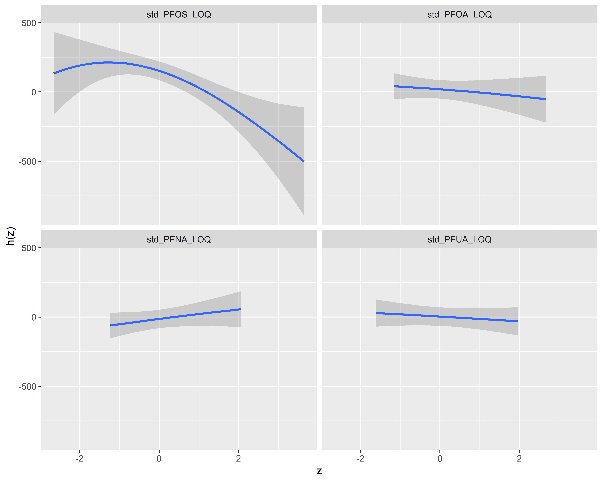 | 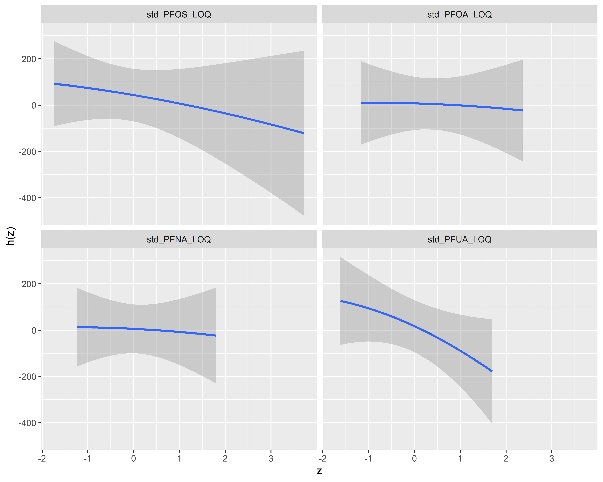 |

**Figure S5** Genotype-Stratified Interactions Between Individual PFAS Within PFAS Mixture on Birth Weight

| rs1801133 GG genotype | rs1801133, other genotypes |
| --- | --- |
| 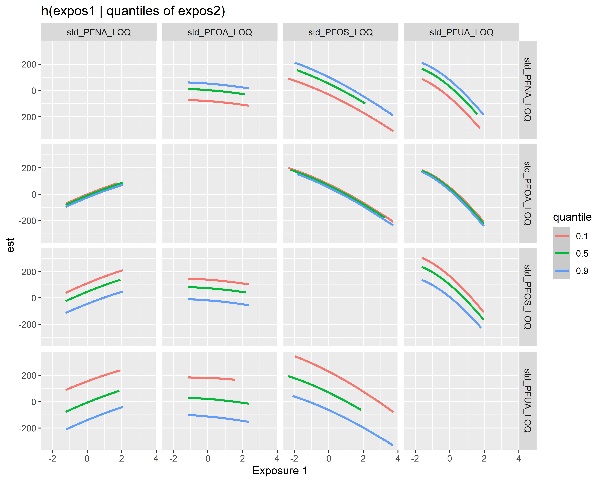 | 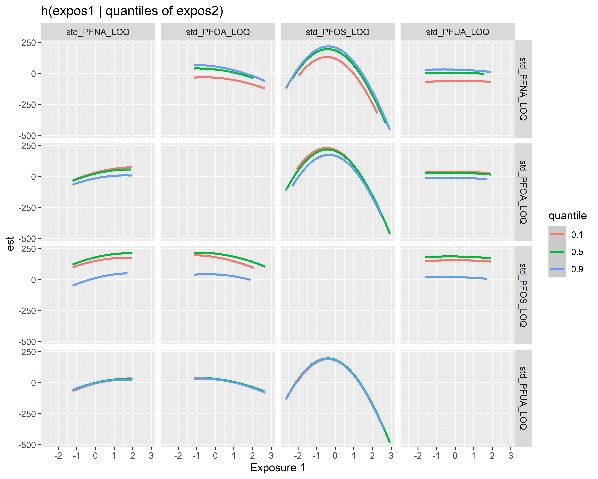 |
| rs2236225 GG genotype | rs2236225, other genotypes |
| 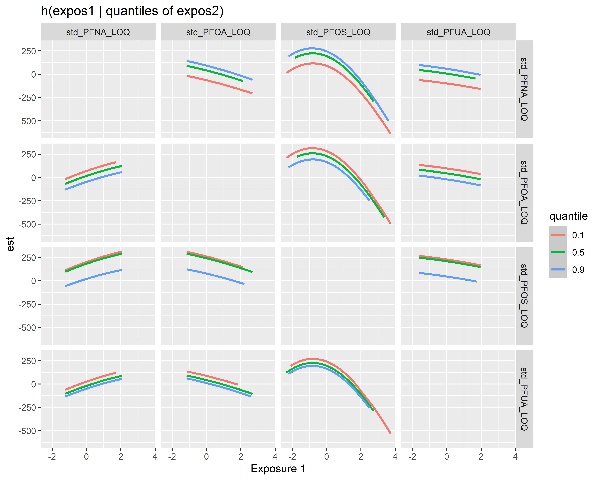 | 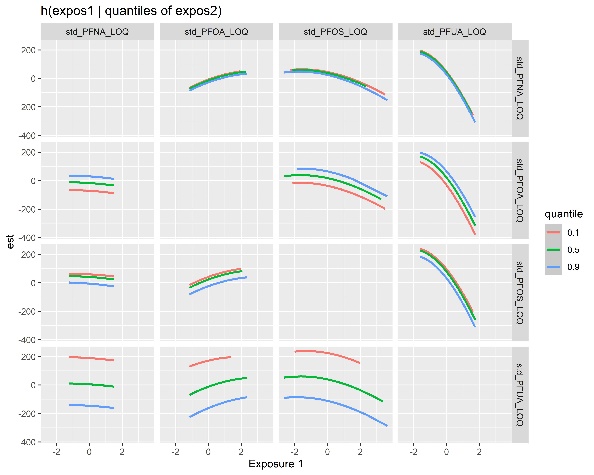 |
| rs1805087 AA genotype | rs1805087, other genotypes |
| 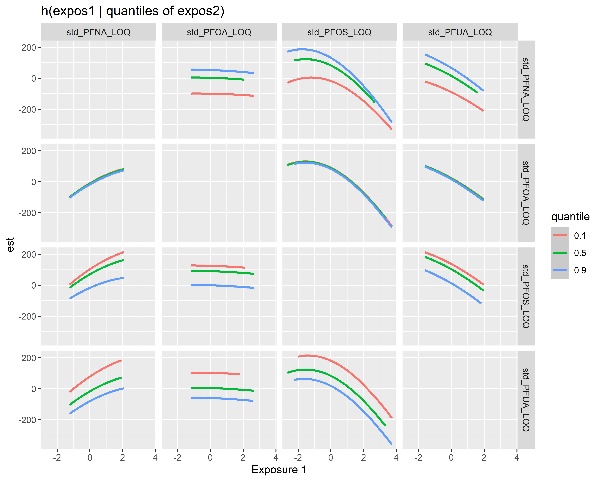 | 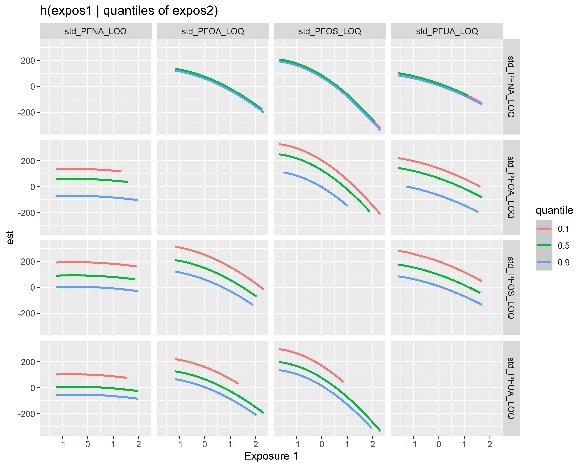 |
| rs1801394 AA genotype | rs1801394, other genotypes |
| 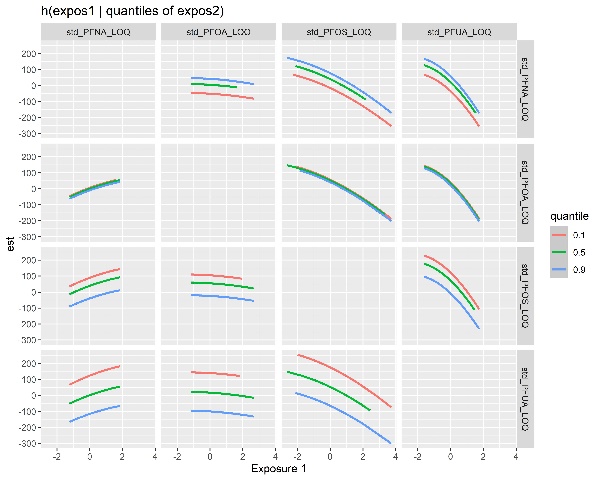 | 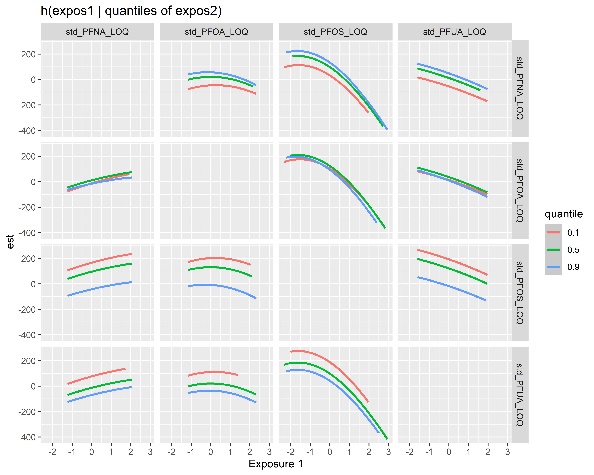 |
| rs234714 CC genotype | rs234714, other genotypes |
| 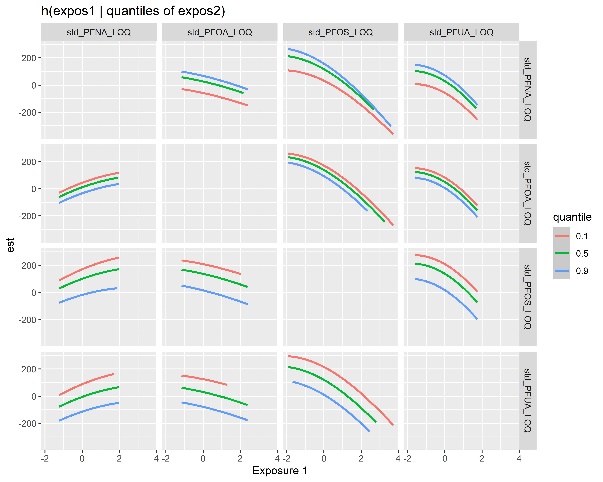 | 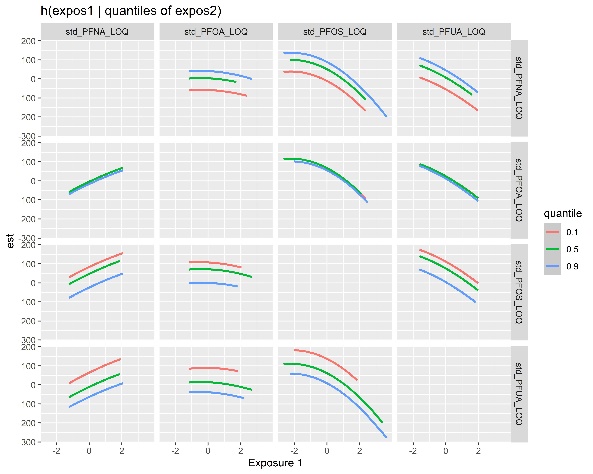 |
| rs10830963 CC genotype | rs10830963, other genotypes |
| 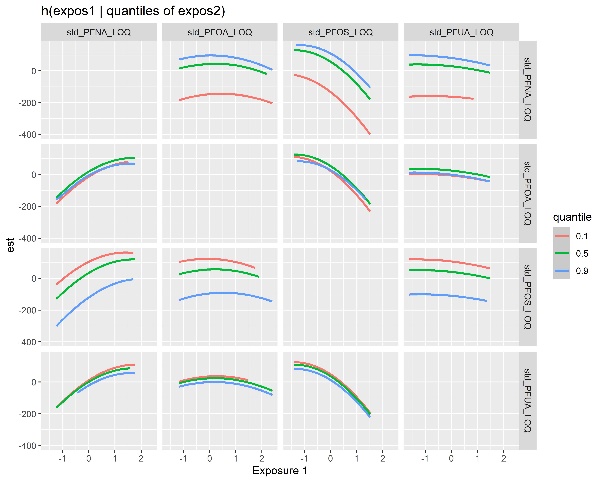 | 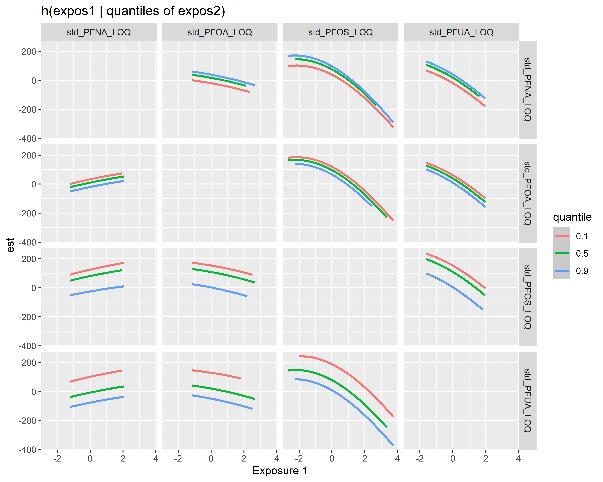 |
| rs1351394 CC genotype | rs1351394, other genotypes |
| 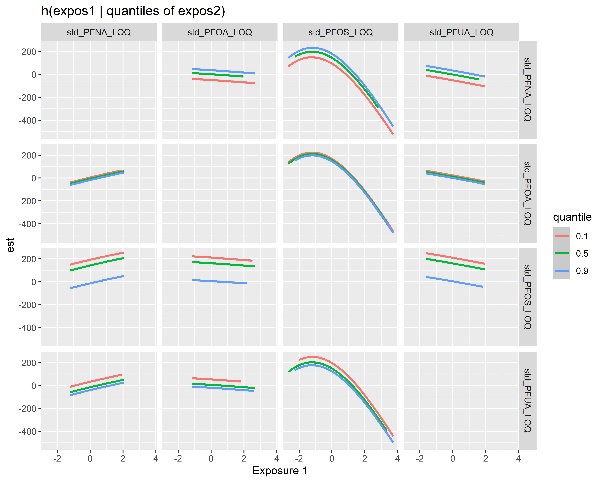 | 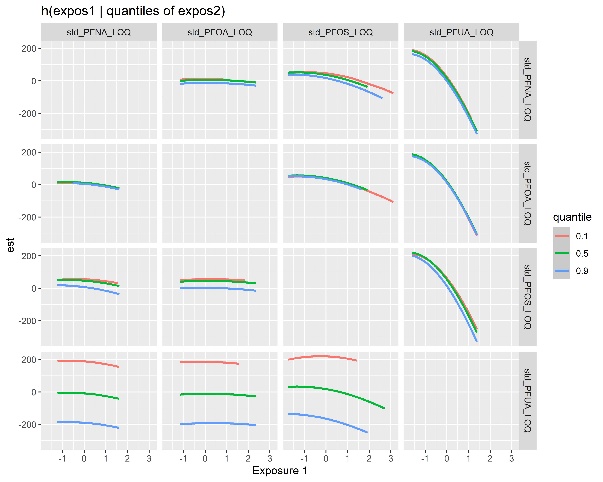 |
| rs1042725 TT genotype | rs1042725, other genotypes |
| 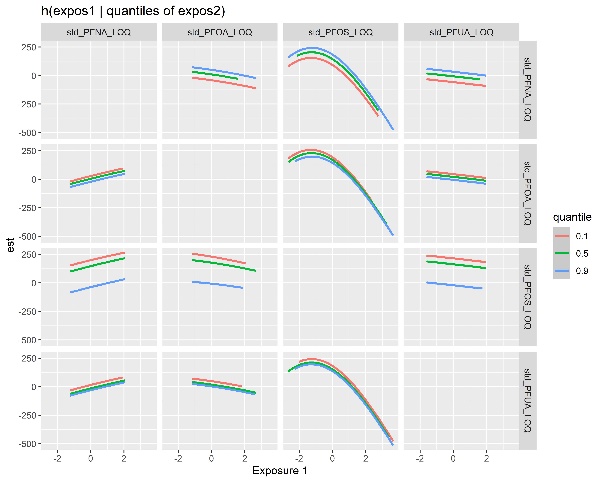 | 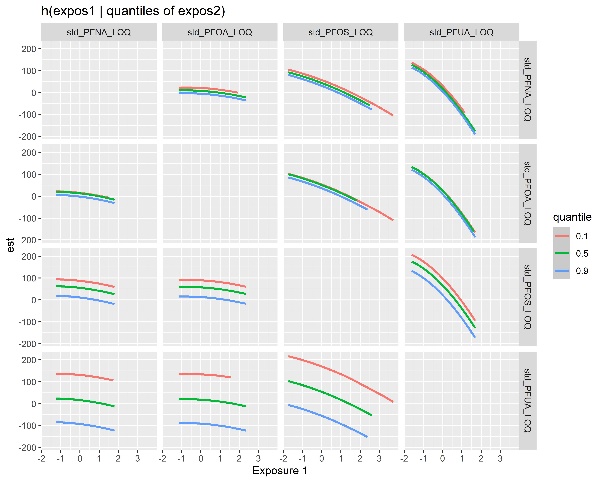 |

**Figure S6** Association Between PFAS Mixture with Head Circumference Across Joint Exposure Quartiles Using Quantile G-Computation

| 1. ***PFAS mixture-head circumference association*** | |
| --- | --- |
| Unadjusted | Adjusted |
| 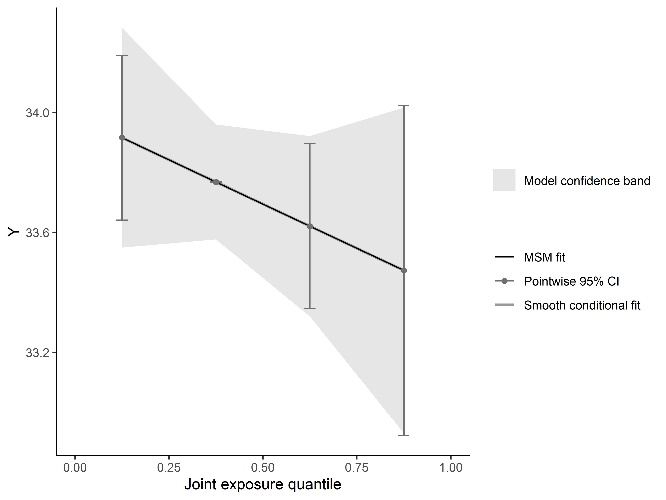 | 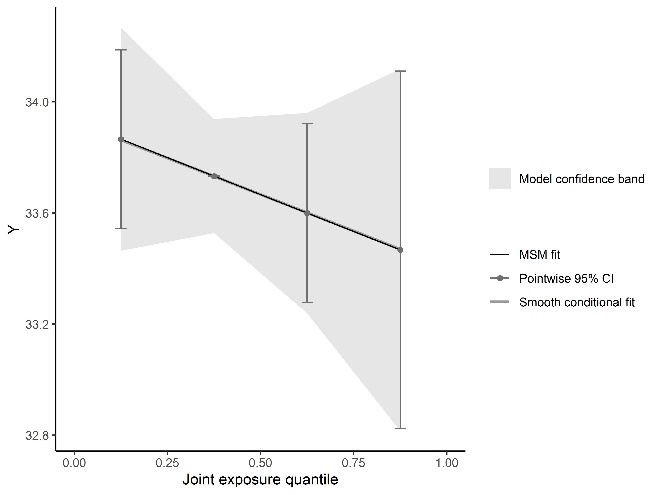 |
| 1. ***PFAS mixture- head circumference association, stratified by genotypes*** | |
| rs1801133 GG genotype | rs1801133, other genotypes |
| 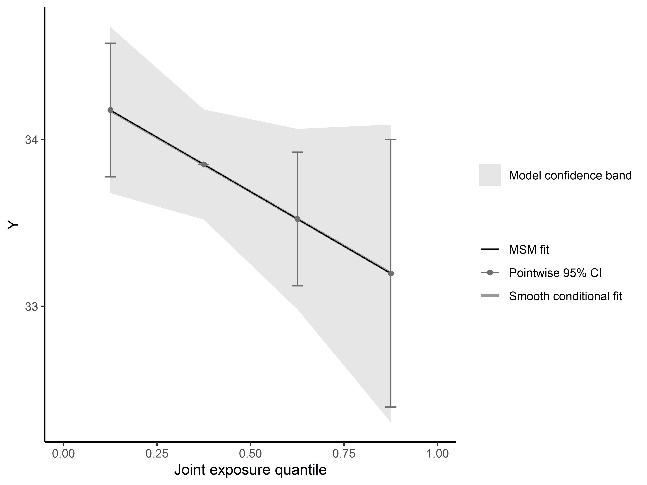 | 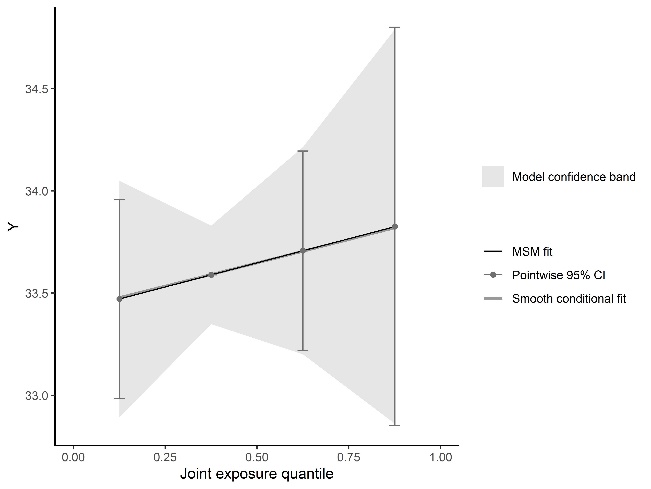 |
| rs2236225 GG genotype | rs2236225, other genotypes |
| 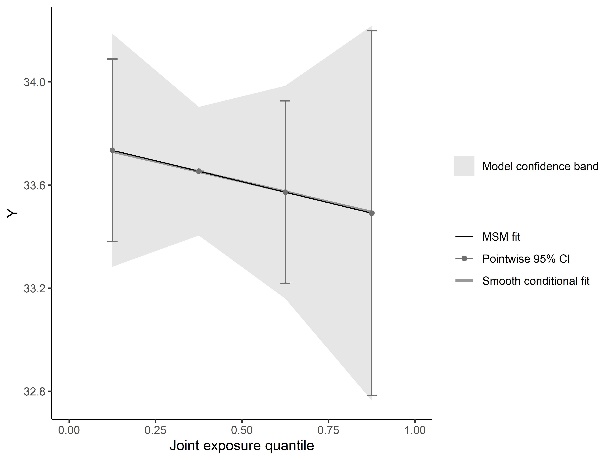 | 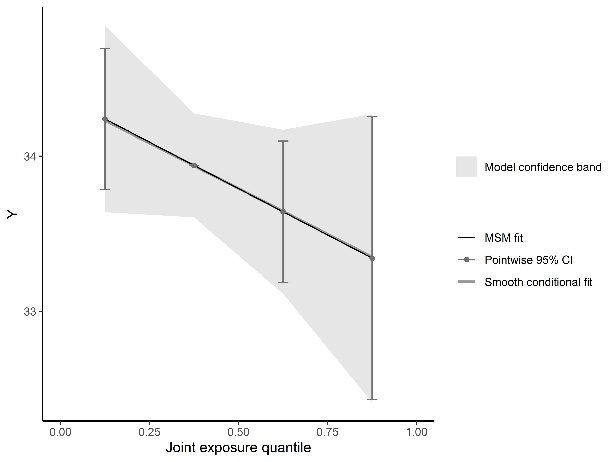 |
| rs1805087 AA genotype | rs1805087, other genotypes |
| 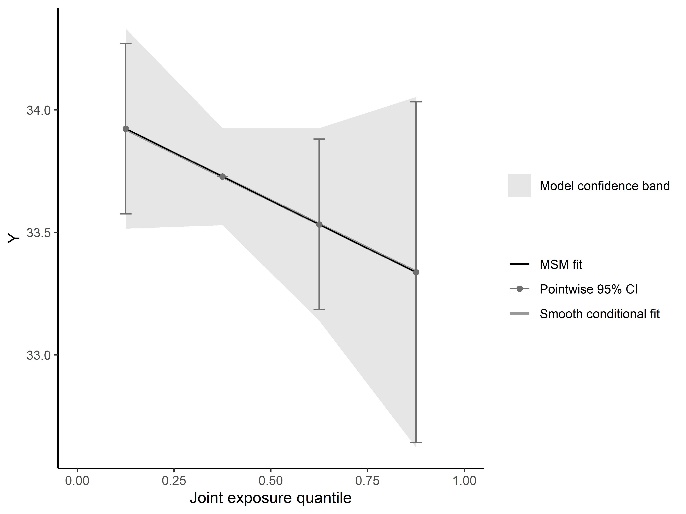 | 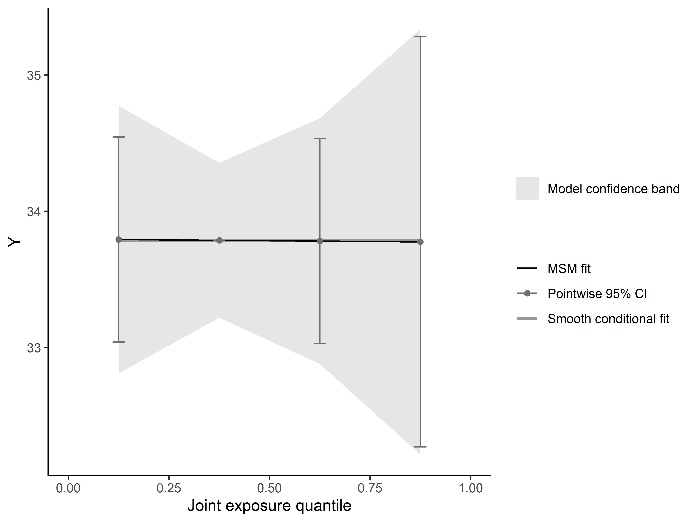 |
| rs1801394 AA genotype | rs1801394, other genotypes |
| 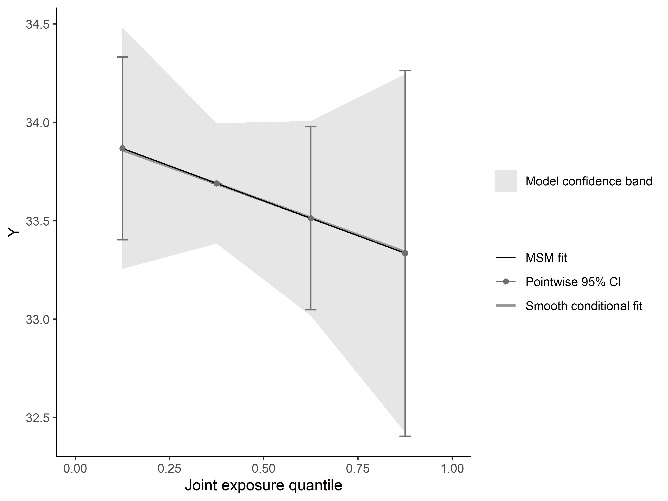 | 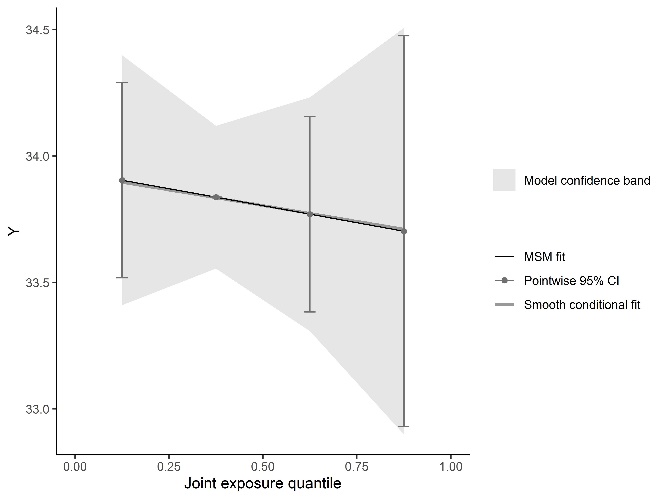 |
| rs234714 CC genotype | rs234714, other genotypes |
| 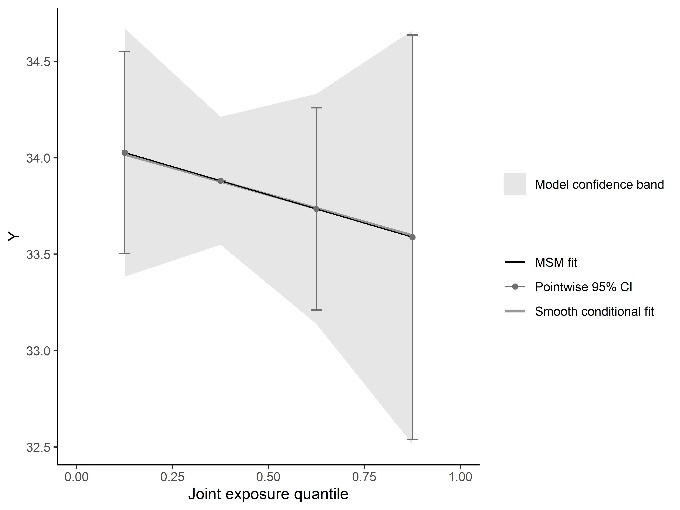 | 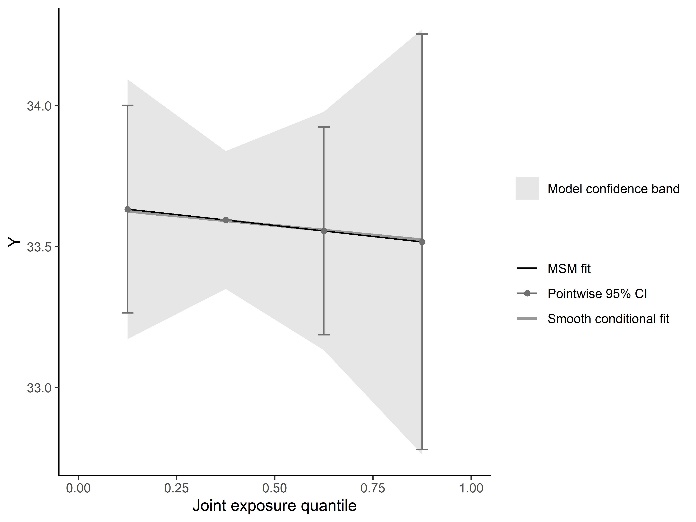 |
| rs10830963 CC genotype | rs10830963, other genotypes |
| 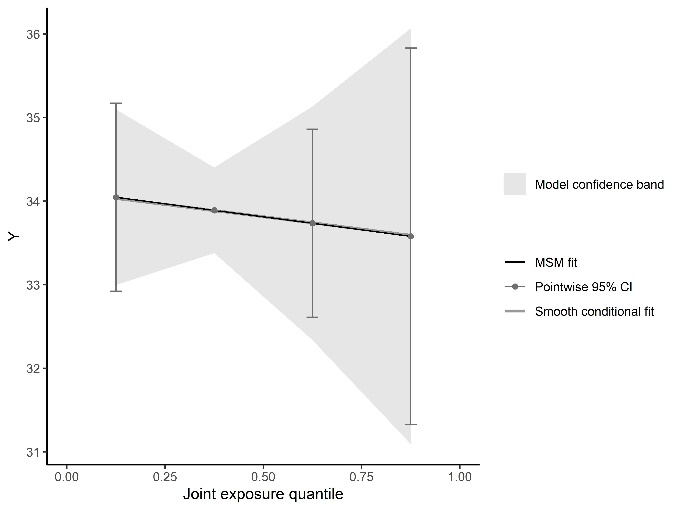 | 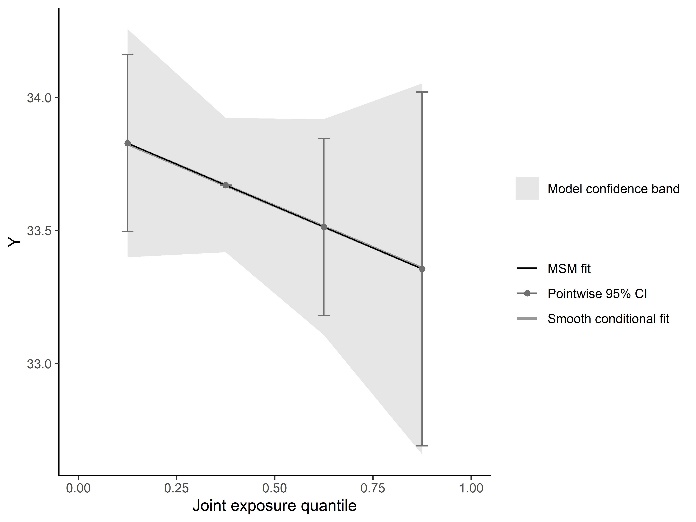 |
| rs1351394 CC genotype | rs1351394, other genotypes |
| 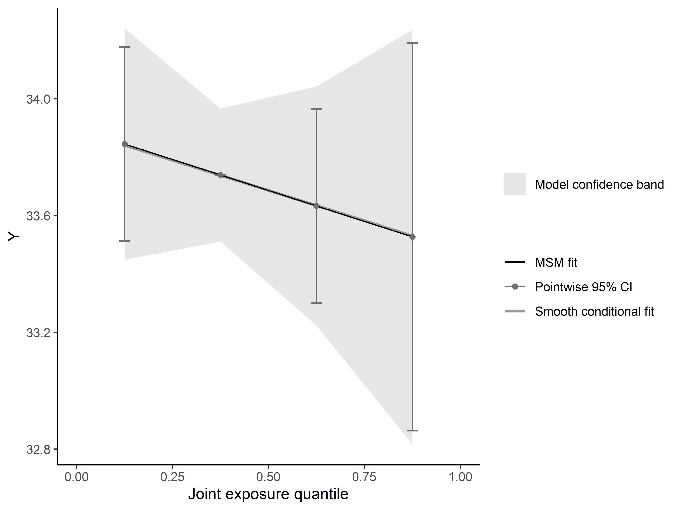 | 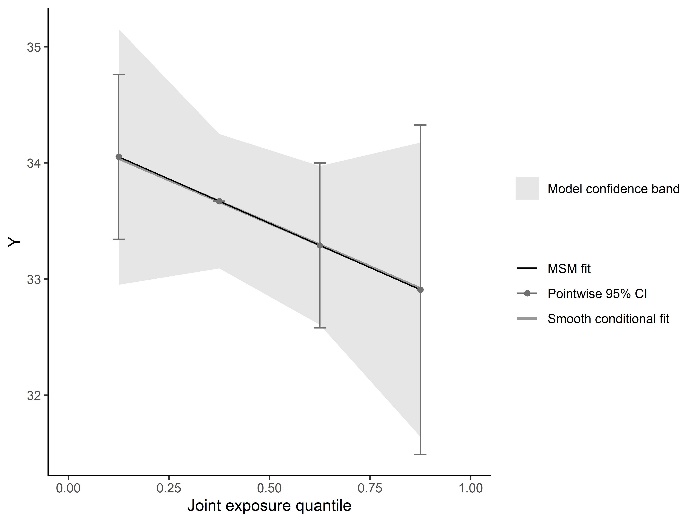 |
| rs1042725 TT genotype | rs1042725, other genotypes |
| 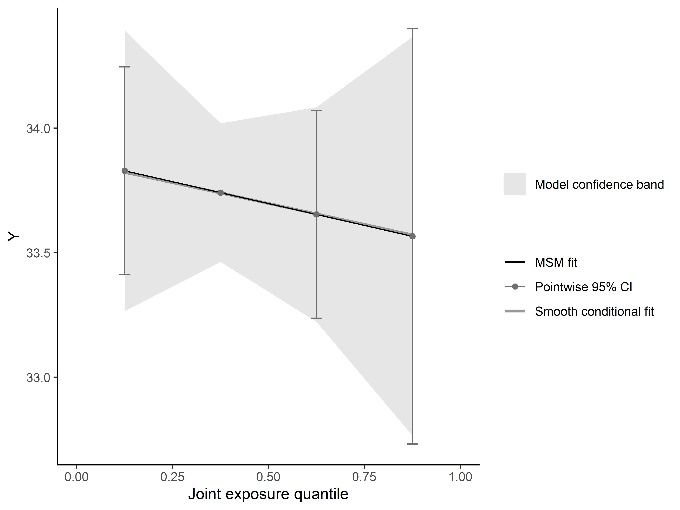 | 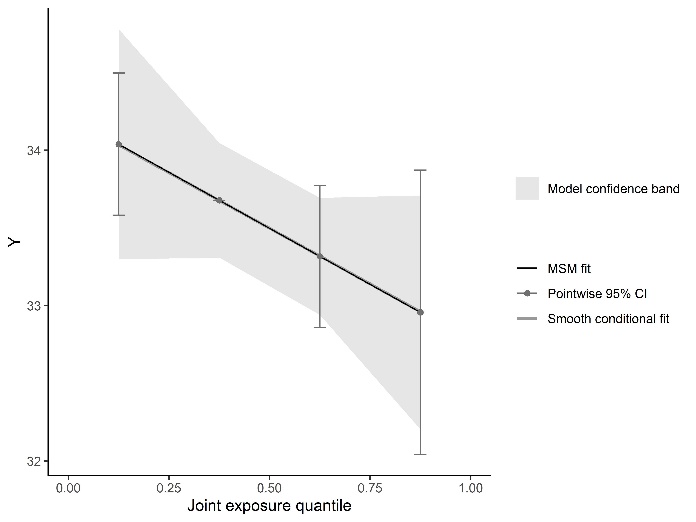 |

**Figure S7** Genotype-Stratified Non-linear Associations Between Individual PFAS Exposure and Head Circumference

| rs1801133 GG genotype | rs1801133, other genotypes |
| --- | --- |
| 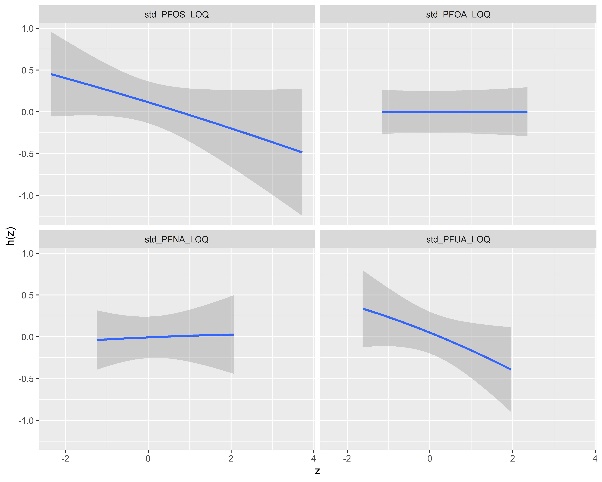 | 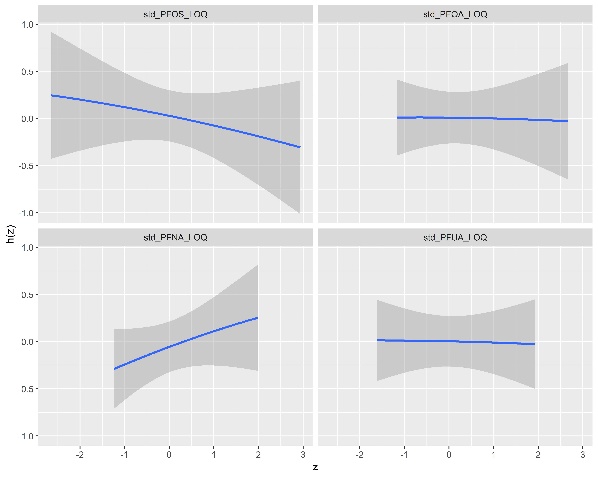 |
| rs2236225 GG genotype | rs2236225, other genotypes |
| 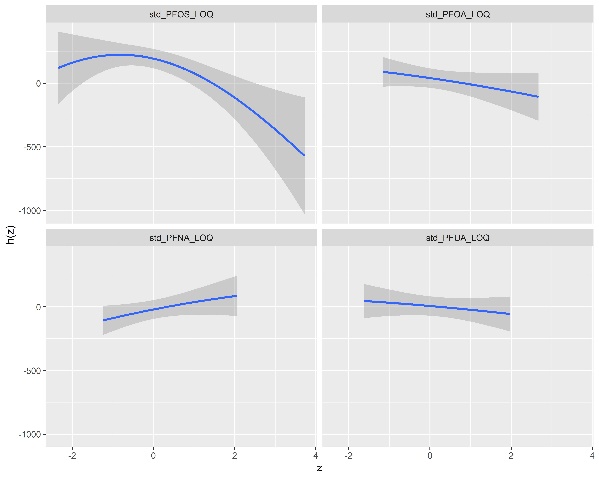 | 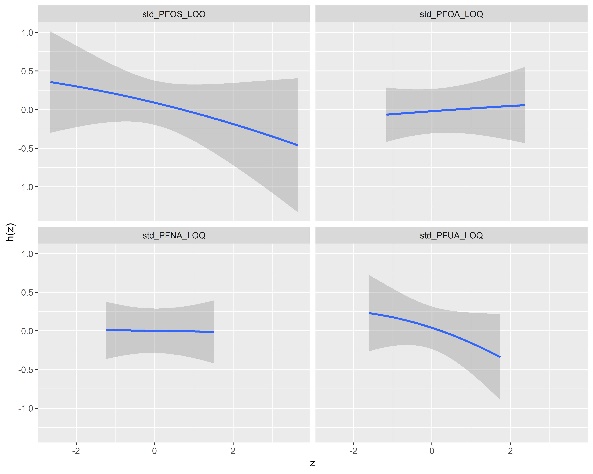 |
| rs1805087 AA genotype | rs1805087, other genotypes |
| 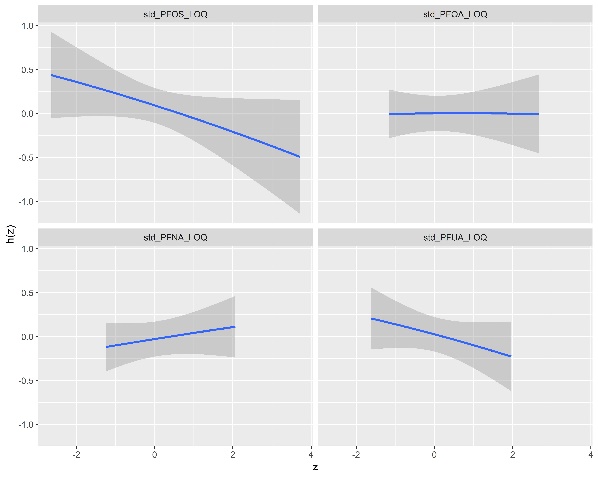 | 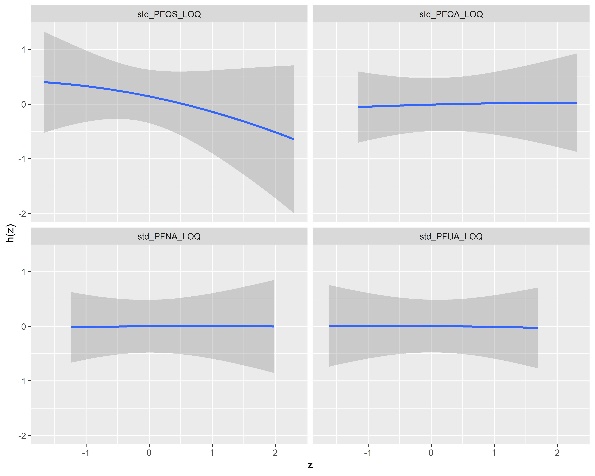 |
| rs1801394 AA genotype | rs1801394, other genotypes |
| 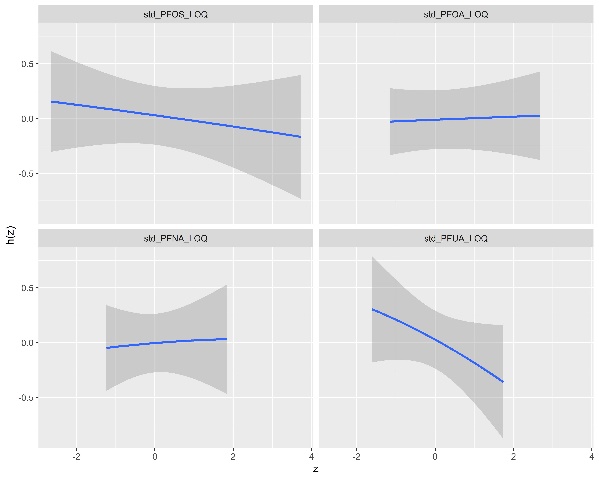 | 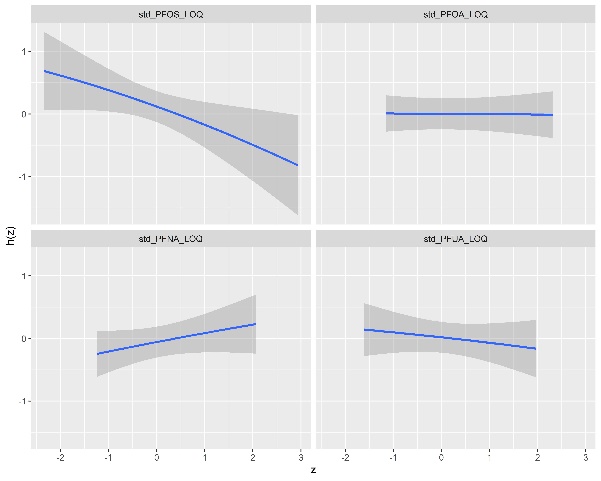 |
| rs234714 CC genotype | rs234714, other genotypes |
| 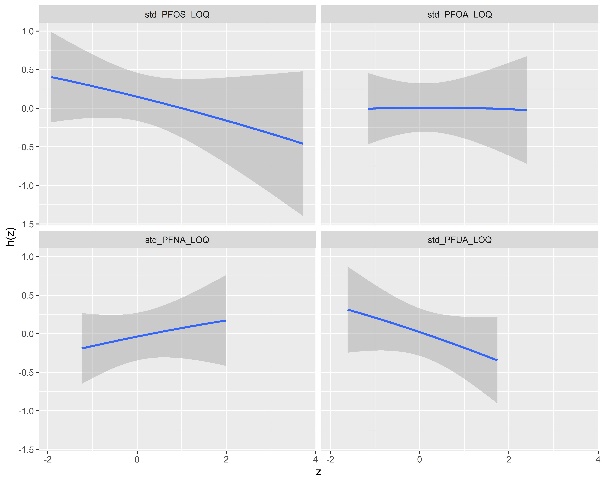 | 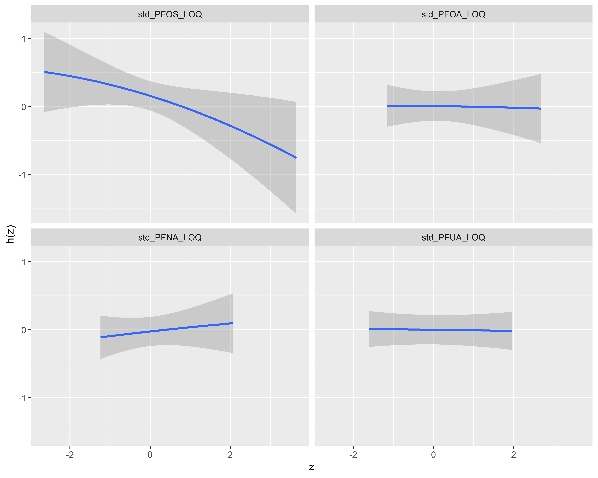 |
| rs10830963 CC genotype | rs10830963, other genotypes |
| 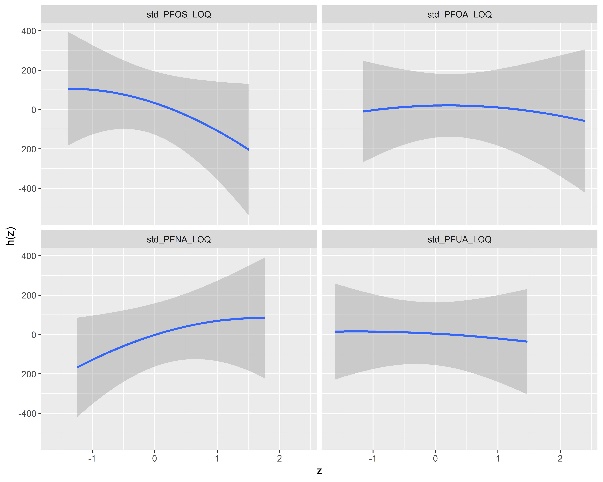 | 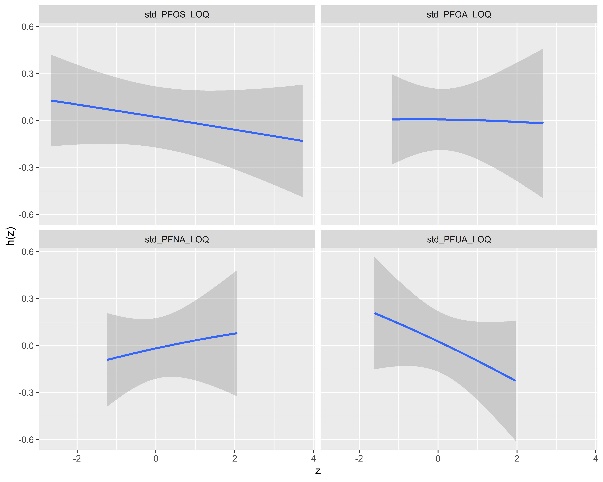 |
| rs1351394 CC genotype | rs1351394, other genotypes |
| 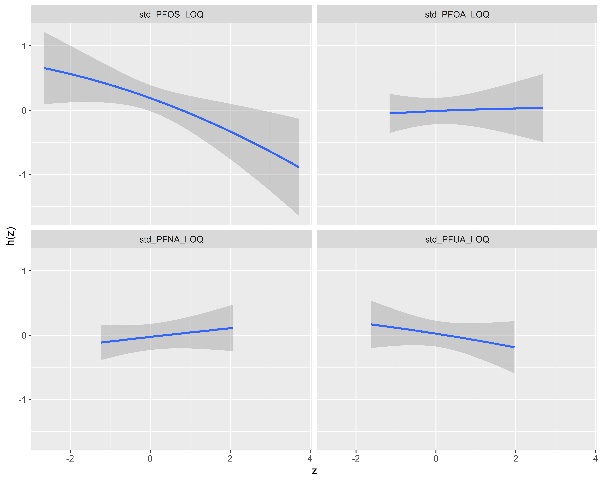 | 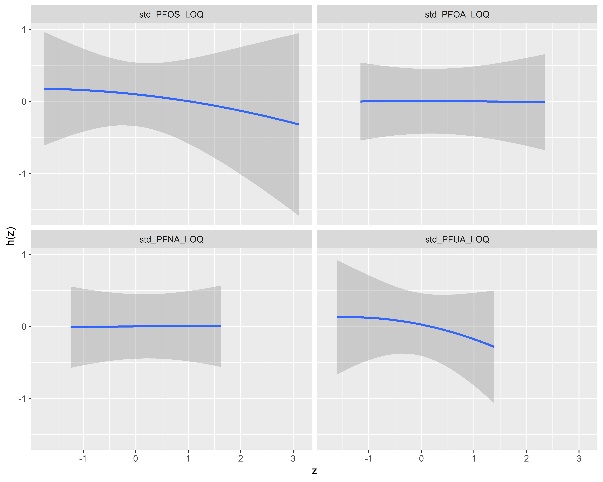 |
| rs1042725 TT genotype | rs1042725, other genotypes |
| 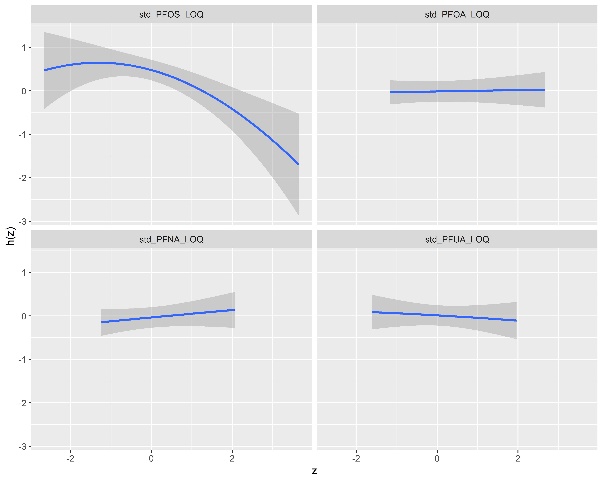 | 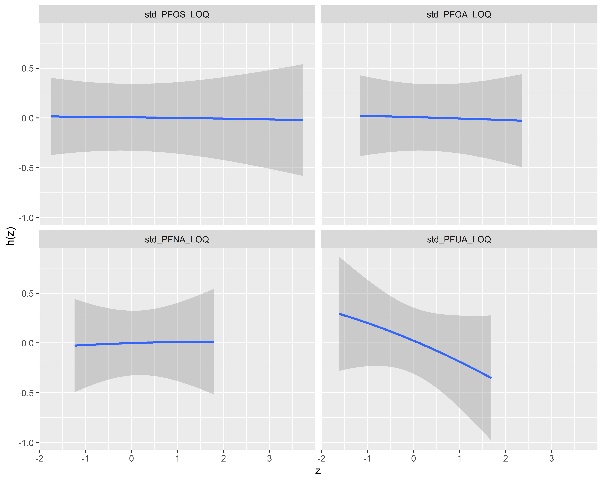 |

**Figure S8** Genotype-Stratified Interactions Between Individual PFAS Within PFAS Mixture on Head Circumference

| rs1801133 GG genotype | rs1801133, other genotypes |
| --- | --- |
| 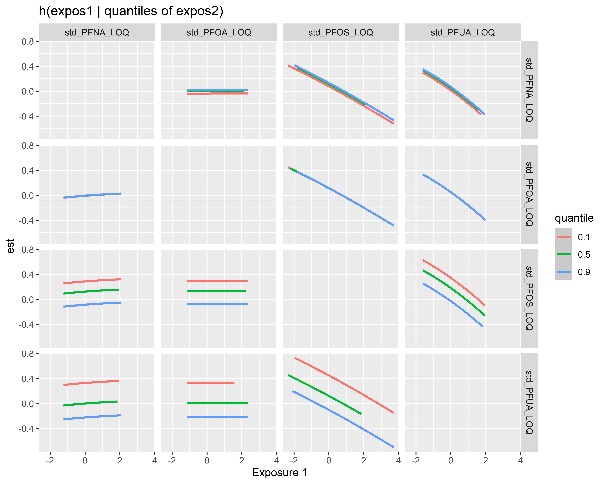 | 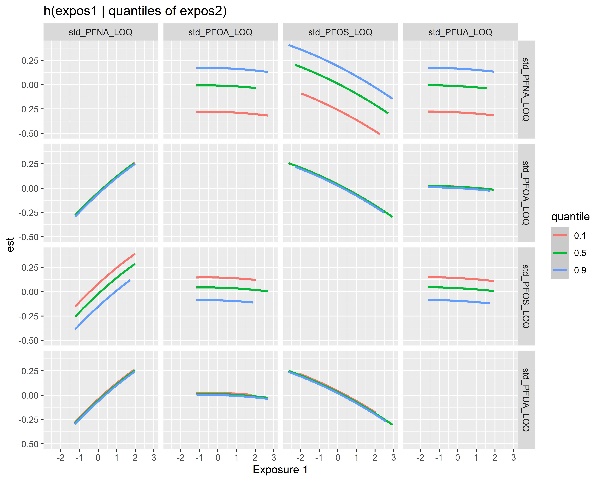 |
| rs2236225 GG genotype | rs2236225, other genotypes |
| 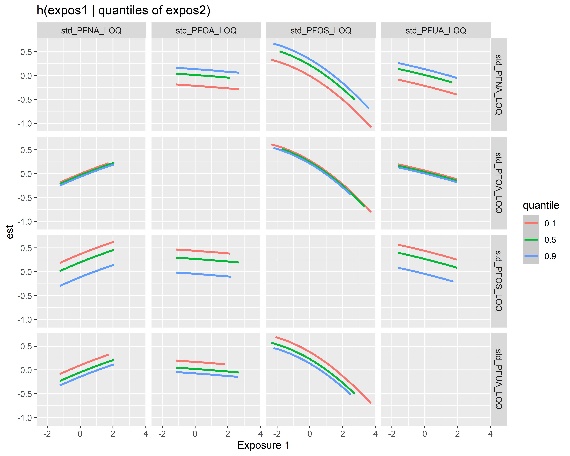 | 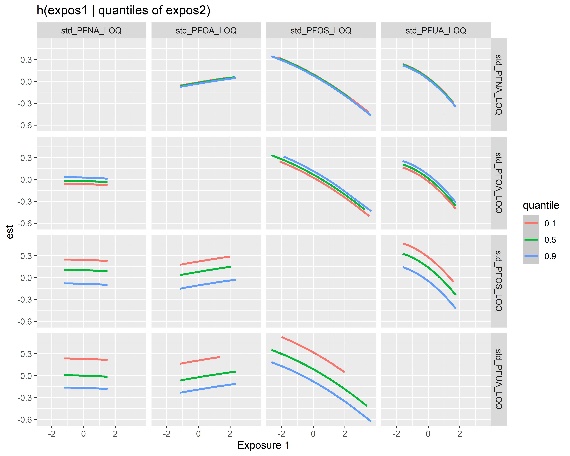 |
| rs1805087 AA genotype | rs1805087, other genotypes |
| 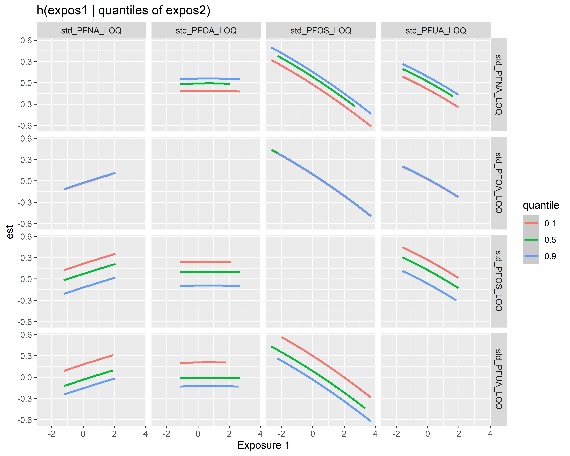 | 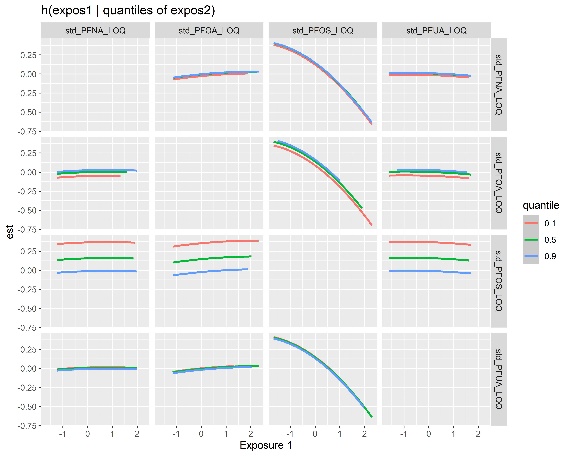 |
| rs1801394 AA genotype | rs1801394, other genotypes |
| 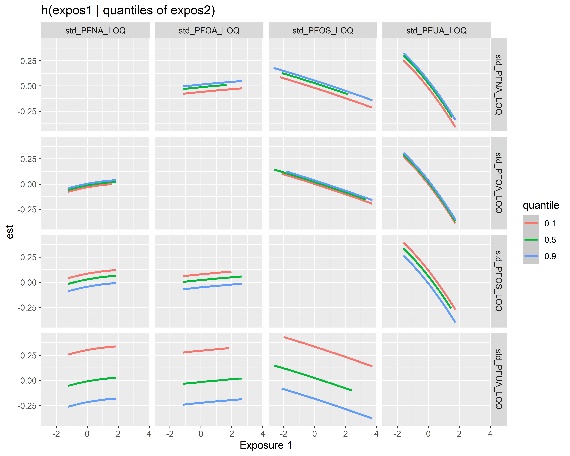 | 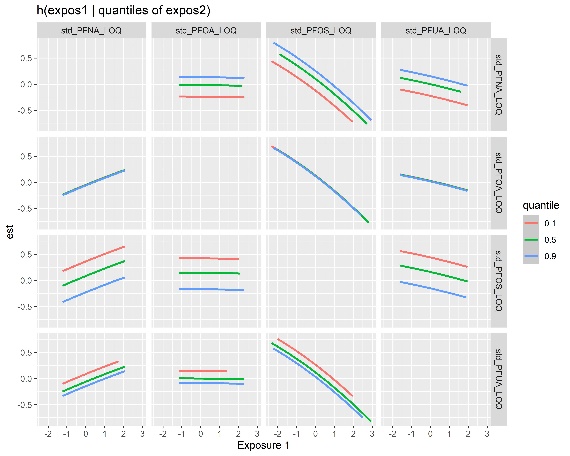 |
| rs234714 CC genotype | rs234714, other genotypes |
| 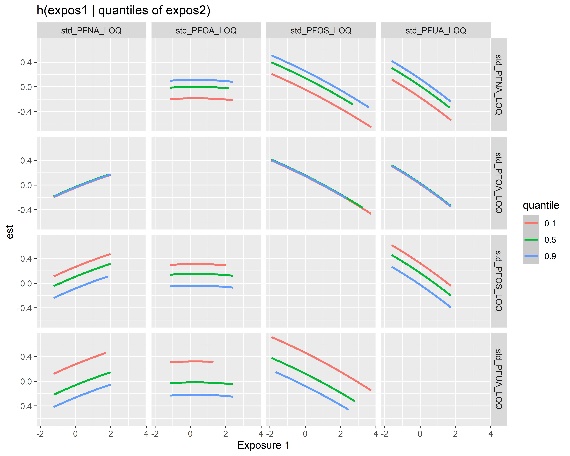 | 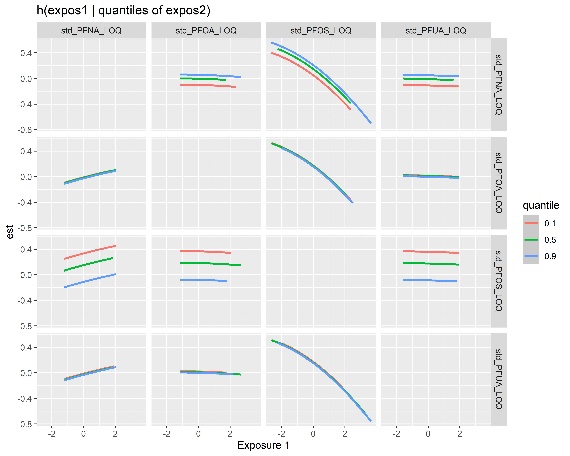 |
| rs10830963 CC genotype | rs10830963, other genotypes |
| 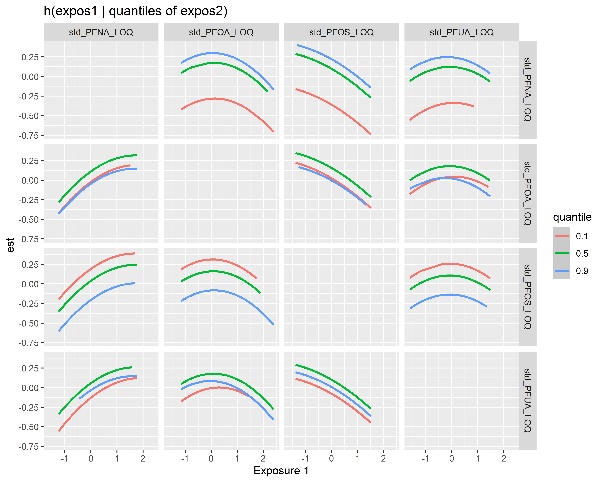 | 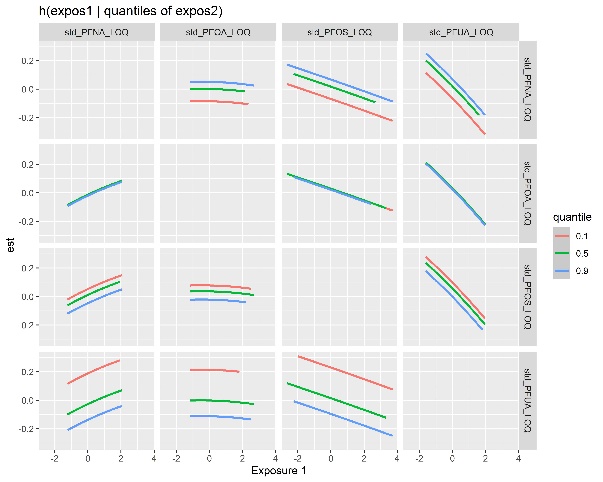 |
| rs1351394 CC genotype | rs1351394, other genotypes |
| 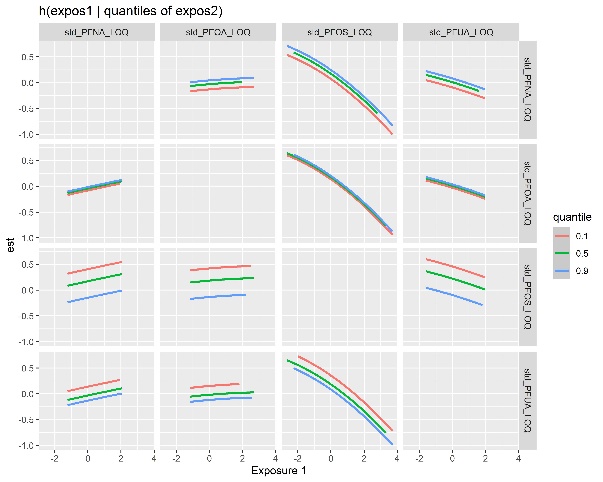 | 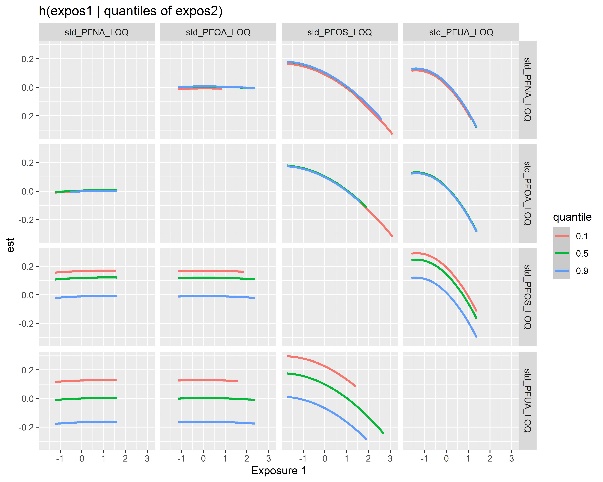 |
| rs1042725 TT genotype | rs1042725, other genotypes |
| 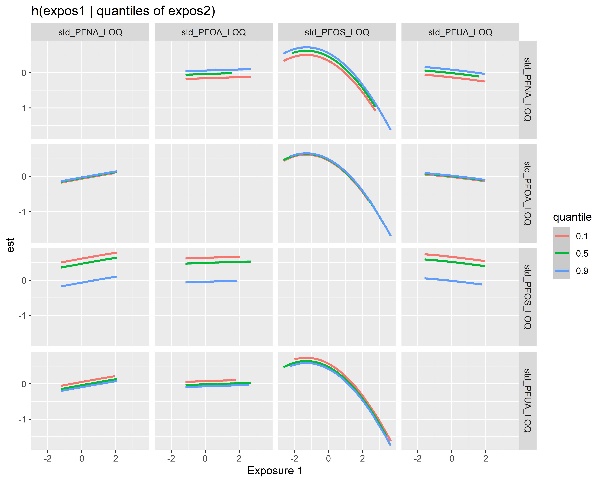 |  |

| **Table S1** *Associations of PFAS concentrations and birth weight, stratified by selected genotypes* | | | | | | | |
| --- | --- | --- | --- | --- | --- | --- | --- |
|  | **Estimate** | **95% confidence interval** | | **Estimate** | **95% confidence interval** | | **P-for-interaction** |
| *rs1801133* | GG genotype | | | Other genotypes | | |  |
| PFOA | -37.94 | -107.49 | 31.62 | -10.25 | -87.50 | 66.99 | 0.645 |
| PFNA | 11.12 | -59.86 | 82.11 | 7.26 | -68.09 | 82.61 | 0.943 |
| PFOS | -89.51 | -157.14 | -21.87 | -73.25 | -153.16 | 6.65 | 0.923 |
| PFUA | -95.21 | -160.37 | -30.05 | -15.33 | -94.58 | 63.93 | 0.118 |
| Mixture | -122.69 | -226.74 | -18.64 | -82.03 | -217.36 | 53.29 | 0.594 |
| *rs2236225* | GG genotype | | | Other genotypes | | |  |
| PFOA | -45.37 | -113.86 | 23.12 | 0.30 | -75.39 | 75.99 | 0.350 |
| PFNA | 32.77 | -32.23 | 97.77 | -15.65 | -95.76 | 64.47 | 0.298 |
| PFOS | -104.52 | -173.37 | -35.66 | -47.75 | -120.38 | 24.87 | 0.266 |
| PFUA | -30.15 | -96.23 | 35.93 | -116.98 | -193.08 | -40.87 | 0.059 |
| Mixture | -82.80 | -182.86 | 17.26 | -126.42 | -239.18 | -13.67 | 0.363 |
| *rs1805087* | AA genotype | | | Other genotypes | | |  |
| PFOA | -0.93 | -57.38 | 55.52 | -125.03 | -248.05 | -2.02 | 0.091 |
| PFNA | 37.72 | -16.59 | 92.04 | -76.27 | -212.37 | 59.83 | 0.076 |
| PFOS | -63.81 | -117.39 | -10.23 | -194.48 | -344.18 | -44.77 | 0.032 |
| PFUA | -48.72 | -102.71 | 5.27 | -139.36 | -274.24 | -4.47 | 0.317 |
| Mixture | -62.66 | -145.96 | 20.63 | -244.89 | -503.69 | 13.92 | 0.021 |
| *rs1801394* | AA genotype | | | Other genotypes | | |  |
| PFOA | -11.68 | -85.38 | 62.01 | -24.57 | -94.04 | 44.89 | 0.510 |
| PFNA | 11.85 | -58.91 | 82.61 | 14.88 | -54.51 | 84.27 | 0.832 |
| PFOS | -70.17 | -135.88 | -4.47 | -113.95 | -190.87 | -37.04 | 0.531 |
| PFUA | -92.16 | -164.68 | -19.64 | -59.51 | -127.53 | 8.51 | 0.561 |
| Mixture | -98.73 | -209.67 | 12.22 | -68.01 | -175.05 | 39.04 | 0.999 |
| *rs234714* | CC genotype | | | Other genotypes | | |  |
| PFOA | -57.72 | -138.21 | 22.78 | 4.46 | -61.01 | 69.93 | 0.409 |
| PFNA | 17.41 | -60.95 | 95.77 | 22.41 | -42.89 | 87.72 | 0.771 |
| PFOS | -100.79 | -177.80 | -23.79 | -53.68 | -120.64 | 13.28 | 0.216 |
| PFUA | -83.99 | -164.07 | -3.92 | -41.80 | -104.95 | 21.36 | 0.337 |
| Mixture | -132.28 | -265.27 | 0.71 | -18.63 | -117.17 | 79.91 | 0.367 |
| *rs10830963* | CC genotype | | | Other genotypes | | |  |
| PFOA | 6.45 | -149.21 | 162.11 | -31.46 | -86.65 | 23.73 | 0.806 |
| PFNA | 133.32 | -16.09 | 282.73 | -7.42 | -61.64 | 46.79 | 0.039 |
| PFOS | -130.53 | -313.17 | 52.11 | -77.65 | -129.86 | -25.44 | 0.867 |
| PFUA | 0.75 | -142.10 | 143.60 | -73.02 | -127.88 | -18.16 | 0.251 |
| Mixture | -5.34 | -269.71 | 259.03 | -116.81 | -208.59 | -25.02 | 0.196 |
| *rs1351394* | CC genotype | | | Other genotypes | | |  |
| PFOA | -20.82 | -76.64 | 34.99 | -43.32 | -168.93 | 82.30 | 0.061 |
| PFNA | 24.64 | -28.13 | 77.41 | -67.20 | -219.15 | 84.76 | 0.621 |
| PFOS | -98.47 | -151.34 | -45.60 | -61.13 | -207.60 | 85.34 | 0.295 |
| PFUA | -37.64 | -90.72 | 15.44 | -182.66 | -323.59 | -41.72 | 0.272 |
| Mixture | -89.03 | -164.55 | -13.50 | -286.36 | -538.32 | -34.40 | 0.506 |
| *rs1042725* | TT genotype | | | Other genotypes | | |  |
| PFOA | -28.50 | -88.92 | 31.92 | -38.37 | -133.51 | 56.76 | 0.918 |
| PFNA | 24.14 | -33.02 | 81.31 | -38.51 | -141.93 | 64.91 | 0.404 |
| PFOS | -104.74 | -161.70 | -47.78 | -57.38 | -162.22 | 47.45 | 0.174 |
| PFUA | -37.72 | -95.69 | 20.26 | -101.27 | -201.36 | -1.18 | 0.249 |
| Mixture | -101.74 | -203.35 | -0.13 | -155.78 | -317.68 | 6.12 | 0.974 |
| a. The concentrations were log-transformed and scaled with mean of 0 and standard deviation of 1. Adjusted for maternal age (> 35 years old or not), education (college or above versus others), family income (higher or lower than the average income), environmental tobacco smoke exposure (yes or no), parity, BMI trajectories (underweight, normal, overweight or obesity), and fish intake. | | | | | | | |

| **Table S2** *Associations of PFAS concentrations and head circumference, stratified by selected genotypes* | | | | | | |  |
| --- | --- | --- | --- | --- | --- | --- | --- |
|  | **Estimate** | **95% confidence interval** | | **Estimate** | **95% confidence interval** | | **P-for-interaction** |
| *rs1801133* | GG genotype | | | Other genotypes | | |  |
| PFOA | -0.07 | -0.31 | 0.18 | 0.10 | -0.16 | 0.35 | 0.479 |
| PFNA | -0.05 | -0.30 | 0.20 | 0.22 | -0.03 | 0.47 | 0.113 |
| PFOS | -0.30 | -0.53 | -0.06 | -0.11 | -0.38 | 0.15 | 0.385 |
| PFUA | -0.23 | -0.46 | 0.00 | -0.01 | -0.27 | 0.26 | 0.151 |
| Mixture | -0.33 | -0.73 | 0.07 | 0.12 | -0.37 | 0.61 | 0.160 |
| *rs2236225* | GG genotype | | | Other genotypes | | |  |
| PFOA | -0.04 | -0.28 | 0.19 | 0.04 | -0.21 | 0.29 | 0.571 |
| PFNA | 0.12 | -0.10 | 0.34 | -0.03 | -0.30 | 0.24 | 0.308 |
| PFOS | -0.27 | -0.51 | -0.03 | -0.19 | -0.43 | 0.05 | 0.689 |
| PFUA | -0.12 | -0.34 | 0.11 | -0.16 | -0.43 | 0.10 | 0.518 |
| Mixture | -0.08 | -0.44 | 0.27 | -0.30 | -0.76 | 0.16 | 0.422 |
| *rs1805087* | AA genotype | | | Other genotypes | | |  |
| PFOA | -0.01 | -0.21 | 0.18 | 0.06 | -0.38 | 0.50 | 0.692 |
| PFNA | 0.09 | -0.10 | 0.27 | 0.04 | -0.43 | 0.52 | 0.979 |
| PFOS | -0.20 | -0.38 | -0.01 | -0.42 | -0.95 | 0.12 | 0.220 |
| PFUA | -0.14 | -0.33 | 0.05 | -0.06 | -0.55 | 0.42 | 0.611 |
| Mixture | -0.20 | -0.54 | 0.15 | -0.01 | -0.76 | 0.75 | 0.665 |
| *rs1801394* | AA genotype | | | Other genotypes | | |  |
| PFOA | 0.06 | -0.20 | 0.32 | -0.02 | -0.25 | 0.22 | 0.667 |
| PFNA | 0.00 | -0.25 | 0.25 | 0.18 | -0.06 | 0.41 | 0.282 |
| PFOS | -0.20 | -0.43 | 0.03 | -0.34 | -0.61 | -0.08 | 0.457 |
| PFUA | -0.24 | -0.50 | 0.02 | -0.10 | -0.33 | 0.14 | 0.524 |
| Mixture | -0.18 | -0.64 | 0.29 | -0.07 | -0.45 | 0.32 | 0.727 |
| *rs234714* | CC genotype | | | Other genotypes | | |  |
| PFOA | -0.04 | -0.34 | 0.26 | 0.03 | -0.19 | 0.24 | 0.862 |
| PFNA | 0.13 | -0.16 | 0.42 | 0.07 | -0.14 | 0.28 | 0.826 |
| PFOS | -0.26 | -0.54 | 0.03 | -0.22 | -0.44 | -0.01 | 0.817 |
| PFUA | -0.26 | -0.55 | 0.04 | -0.03 | -0.23 | 0.18 | 0.191 |
| Mixture | -0.15 | -0.67 | 0.38 | -0.04 | -0.41 | 0.33 | 0.927 |
| *rs10830963* | CC genotype | | | Other genotypes | | |  |
| PFOA | 0.02 | -0.54 | 0.59 | 0.00 | -0.19 | 0.19 | 0.766 |
| PFNA | 0.37 | -0.17 | 0.92 | 0.03 | -0.15 | 0.22 | 0.204 |
| PFOS | -0.29 | -0.96 | 0.37 | -0.23 | -0.41 | -0.05 | 0.955 |
| PFUA | 0.09 | -0.43 | 0.60 | -0.15 | -0.34 | 0.04 | 0.402 |
| Mixture | -0.16 | -1.28 | 0.97 | -0.16 | -0.49 | 0.17 | 0.618 |
| *rs1351394* | CC genotype | | | Other genotypes | | |  |
| PFOA | 0.03 | -0.18 | 0.23 | -0.05 | -0.42 | 0.31 | 0.547 |
| PFNA | 0.11 | -0.08 | 0.30 | -0.05 | -0.49 | 0.39 | 0.590 |
| PFOS | -0.27 | -0.46 | -0.07 | -0.17 | -0.59 | 0.25 | 0.699 |
| PFUA | -0.10 | -0.29 | 0.09 | -0.19 | -0.62 | 0.24 | 0.671 |
| Mixture | -0.11 | -0.44 | 0.23 | -0.38 | -1.09 | 0.33 | 0.650 |
| *rs1042725* | TT genotype | | | Other genotypes | | |  |
| PFOA | 0.04 | -0.18 | 0.26 | -0.10 | -0.39 | 0.20 | 0.489 |
| PFNA | 0.12 | -0.09 | 0.32 | -0.02 | -0.34 | 0.30 | 0.580 |
| PFOS | -0.32 | -0.53 | -0.11 | -0.06 | -0.39 | 0.27 | 0.177 |
| PFUA | -0.07 | -0.29 | 0.14 | -0.25 | -0.57 | 0.06 | 0.377 |
| Mixture | -0.09 | -0.51 | 0.33 | -0.36 | -0.82 | 0.10 | 0.681 |
| a. The concentrations were log-transformed and scaled with mean of 0 and standard deviation of 1. Adjusted for maternal age (> 35 years old or not), education (college or above versus others), family income (higher or lower than the average income), environmental tobacco smoke exposure (yes or no), parity, BMI trajectories (underweight, normal, overweight or obesity), and fish intake. | | | | | | | |

| **Table S3** Baseline characteristics and birth outcomes of participants included in the study and the TBPS I singleton population (Presented in mean ± SD or n (%)) | | | | | | | | | | | | | |
| --- | --- | --- | --- | --- | --- | --- | --- | --- | --- | --- | --- | --- | --- |
|  | | | | Total (N=480) | | Selected (N=338) | | | Others (N=142) | | | p-value | |
| ***Maternal conditions*** | | | | | | | | | | | | | |
| Maternal age (years) | | | | 30.9 ± 4.6 | | 30.5 ± 4.6 | | | 31.8 ± 4.5 | | | 0.006 | |
| Maternal weight (kg) | | | | 53.2 ± 8.1 | | 53.4 ± 8.1 | | | 52.5 ± 8.1 | | | 0.231 | |
| Maternal body mass index before pregnancy | | | |  | |  | | |  | | | 0.135 | |
| < 18.5 kg/m2 | | | | 77 (16.0%) | | 47 (13.9%) | | | 30 (21.1%) | | |  | |
| 18.5-24 kg/m2 | | | | 371 (77.3%) | | 267 (79.0%) | | | 104 (73.2%) | | |  | |
| > 24 kg/m2 | | | | 32 (6.7%) | | 24 (7.1%) | | | 8 (5.6%) | | |  | |
| Family income above 100 thousand new Taiwan dollar | | | | 194 (40.4%) | | 130 (38.5%) | | | 64 (45.1%) | | | 0.178 | |
| Maternal smoking | | | | 26 (5.4%) | | 21 (6.2%) | | | 5 (3.5%) | | | 0.234 | |
| Secondhand smoke exposure | | | | 137 (28.5%) | | 99 (29.3%) | | | 38 (26.8%) | | | 0.575 | |
| Maternal alcohol consumption | | | | 21 (4.4%) | | 15 (4.4%) | | | 6 (4.2%) | | | 0.917 | |
| Vitamin supplementation | | | | 286 (59.6%) | | 197 (58.3%) | | | 89 (62.7%) | | | 0.371 | |
| Folic acid supplementation | | | | 52 (10.8%) | | 38 (11.2%) | | | 14 (9.9%) | | | 0.656 | |
| Maternal education above college level | | | | 213 (44.4%) | | 142 (42.0%) | | | 71 (50.0%) | | | 0.108 | |
| ***Birth conditions*** | | | | | | | | | | | | | |
| Female | | | | 238 (49.6%) | | 167 (49.4%) | | | 71 (50.0%) | | | 0.906 | |
| First born | | | | 230 (47.9%) | | 164 (48.5%) | | | 66 (46.5%) | | | 0.683 | |
| Cesarean section | | | | 188 (39.2%) | | 128 (37.9%) | | | 60 (42.3%) | | | 0.369 | |
| **Table S4** Unadjusted and adjusted associations between PFAS concentration and candidate SNPs a | | | | | | | | | | | | | | |
| Name of PFAS | Candidate SNP | Unadjusted | | | | | | Adjusted | | | | | | |
| Estimate | 95% confidence interval | | | | p-value | Estimate | | 95% confidence interval | | | p-value | |
| PFOA | rs1801133 | 0.11 | -0.10 | | 0.32 | | 0.315 | 0.13 | | -0.09 | 0.34 | | 0.245 | |
| PFOA | rs2236225 | -0.11 | -0.33 | | 0.11 | | 0.338 | -0.09 | | -0.31 | 0.13 | | 0.431 | |
| PFOA | rs1805087 | 0.07 | -0.20 | | 0.35 | | 0.605 | 0.00 | | -0.28 | 0.28 | | 0.985 | |
| PFOA | rs1801394 | -0.06 | -0.28 | | 0.15 | | 0.560 | -0.06 | | -0.27 | 0.16 | | 0.603 | |
| PFOA | rs234714 | 0.00 | -0.21 | | 0.21 | | 0.993 | -0.03 | | -0.24 | 0.19 | | 0.807 | |
| PFOA | rs10830963 | -0.09 | -0.37 | | 0.20 | | 0.553 | -0.11 | | -0.39 | 0.18 | | 0.460 | |
| PFOA | rs1351394 | 0.14 | -0.14 | | 0.42 | | 0.335 | 0.11 | | -0.17 | 0.38 | | 0.458 | |
| PFOA | rs1042725 | 0.20 | -0.03 | | 0.44 | | 0.090 | 0.17 | | -0.07 | 0.40 | | 0.165 | |
| PFNA | rs1801133 | 0.02 | -0.19 | | 0.23 | | 0.860 | 0.01 | | -0.21 | 0.23 | | 0.907 | |
| PFNA | rs2236225 | -0.04 | -0.26 | | 0.19 | | 0.749 | -0.03 | | -0.25 | 0.20 | | 0.819 | |
| PFNA | rs1805087 | -0.08 | -0.35 | | 0.20 | | 0.594 | -0.10 | | -0.38 | 0.19 | | 0.499 | |
| PFNA | rs1801394 | 0.10 | -0.12 | | 0.31 | | 0.377 | 0.10 | | -0.12 | 0.31 | | 0.387 | |
| PFNA | rs234714 | -0.02 | -0.24 | | 0.19 | | 0.845 | 0.00 | | -0.22 | 0.22 | | 0.979 | |
| PFNA | rs10830963 | -0.06 | -0.35 | | 0.22 | | 0.668 | -0.08 | | -0.37 | 0.21 | | 0.594 | |
| PFNA | rs1351394 | 0.21 | -0.07 | | 0.49 | | 0.137 | 0.22 | | -0.07 | 0.50 | | 0.134 | |
| PFNA | rs1042725 | 0.15 | -0.09 | | 0.38 | | 0.218 | 0.16 | | -0.07 | 0.40 | | 0.179 | |
| PFOS | rs1801133 | 0.08 | -0.13 | | 0.29 | | 0.469 | 0.09 | | -0.13 | 0.30 | | 0.436 | |
| PFOS | rs2236225 | -0.07 | -0.29 | | 0.15 | | 0.548 | -0.08 | | -0.30 | 0.14 | | 0.493 | |
| PFOS | rs1805087 | -0.19 | -0.47 | | 0.08 | | 0.173 | -0.17 | | -0.45 | 0.11 | | 0.228 | |
| PFOS | rs1801394 | -0.15 | -0.37 | | 0.06 | | 0.161 | -0.16 | | -0.38 | 0.05 | | 0.132 | |
| PFOS | rs234714 | -0.15 | -0.37 | | 0.06 | | 0.156 | -0.12 | | -0.34 | 0.10 | | 0.278 | |
| PFOS | rs10830963 | 0.05 | -0.23 | | 0.34 | | 0.709 | 0.06 | | -0.23 | 0.34 | | 0.701 | |
| PFOS | rs1351394 | -0.08 | -0.36 | | 0.20 | | 0.585 | -0.06 | | -0.34 | 0.21 | | 0.651 | |
| PFOS | rs1042725 | -0.12 | -0.35 | | 0.12 | | 0.334 | -0.10 | | -0.33 | 0.14 | | 0.425 | |
| PFUA | rs1801133 | 0.01 | -0.21 | | 0.22 | | 0.956 | 0.00 | | -0.22 | 0.21 | | 0.965 | |
| PFUA | rs2236225 | -0.09 | -0.31 | | 0.14 | | 0.441 | -0.09 | | -0.31 | 0.14 | | 0.452 | |
| PFUA | rs1805087 | 0.02 | -0.25 | | 0.30 | | 0.871 | 0.00 | | -0.28 | 0.28 | | 0.996 | |
| PFUA | rs1801394 | 0.07 | -0.14 | | 0.29 | | 0.504 | 0.08 | | -0.13 | 0.30 | | 0.450 | |
| PFUA | rs234714 | -0.03 | -0.25 | | 0.18 | | 0.769 | 0.00 | | -0.22 | 0.22 | | 0.984 | |
| PFUA | rs10830963 | 0.27 | -0.01 | | 0.55 | | 0.062 | 0.27 | | -0.02 | 0.55 | | 0.067 | |
| PFUA | rs1351394 | -0.09 | -0.37 | | 0.19 | | 0.516 | -0.11 | | -0.39 | 0.17 | | 0.450 | |
| PFUA | rs1042725 | -0.13 | -0.37 | | 0.11 | | 0.279 | -0.14 | | -0.38 | 0.09 | | 0.237 | |
| a. The concentrations were log-transformed and scaled with mean of 0 and standard deviation of 1. Models are adjusted with maternal age (> 35 years old or not), education (college or above versus others), family income (higher or lower than the average income), environmental tobacco smoke exposure (yes or no), parity, and BMI trajectories (underweight, normal, overweight or obesity). | | | | | | | | | | | | | | |
| Abbreviations: PFOA, perfluorooctanoic acid; PFNA, perfluorononanoic acid; PFOS, perfluorooctane sulfonate; PFUA, perfluoroundecanoic acid; SNP, single nucleotide polymorphism. | | | | | | | | | | | | | | |

| **Table S5** Unadjusted and adjusted associations of PFAS concentrations with birth weight and head circumference, after additional adjustment for fish intake a | | | | | | | | |
| --- | --- | --- | --- | --- | --- | --- | --- | --- |
|  | Unadjusted | | | | Adjusted | | | |
|  | Estimate | 95% confidence interval | | p-value | Estimate | 95% confidence interval | | p-value |
| *Birth weight (g)* | | | | | | | | |
| PFOA | -25.05 | -75.39 | 25.29 | 0.330 | -23.53 | -73.98 | 26.92 | 0.361 |
| PFNA | 13.23 | -37.16 | 63.63 | 0.607 | 18.25 | -31.42 | 67.91 | 0.472 |
| PFOS | -75.02 | -124.79 | -25.25 | 0.003 | -87.04 | -136.71 | -37.37 | 0.001 |
| PFUA | -58.84 | -108.86 | -8.82 | 0.022 | -58.34 | -107.91 | -8.78 | 0.022 |
| Mixture | -88.83 | -168.42 | -9.24 | 0.029 | -89.58 | -170.84 | -8.32 | 0.031 |
| *Head circumference (cm)* | | | | | | | | |
| PFOA | 0.04 | -0.14 | 0.22 | 0.655 | 0.00 | -0.17 | 0.18 | 0.990 |
| PFNA | 0.05 | -0.13 | 0.23 | 0.565 | 0.09 | -0.08 | 0.26 | 0.314 |
| PFOS | -0.26 | -0.44 | -0.09 | 0.004 | -0.25 | -0.42 | -0.08 | 0.005 |
| PFUA | -0.14 | -0.31 | 0.04 | 0.134 | -0.12 | -0.29 | 0.05 | 0.176 |
| Mixture | -0.15 | -0.45 | 0.14 | 0.301 | -0.13 | -0.47 | 0.20 | 0.437 |
| a. The concentrations were log-transformed and scaled with mean of 0 and standard deviation of 1. | | | | | |  |  |  |
| b. Adjusted for maternal age (> 35 years old or not), education (college or above versus others), family income (higher or lower than the average income), environmental tobacco smoke exposure (yes or no), parity, BMI trajectories (underweight, normal, overweight or obesity), and fish intake. | | | | | | | | |

| **Table S6** *Associations of PFAS concentrations and birth weight, stratified by selected genotypes* | | | | | | | |
| --- | --- | --- | --- | --- | --- | --- | --- |
|  | **Estimate** | **95% confidence interval** | | **Estimate** | **95% confidence interval** | | **P-for-interaction** |
| *rs1801133* | GG genotype | | | Other genotypes | | |  |
| PFOA | -35.10 | -104.33 | 34.12 | -7.61 | -83.54 | 68.32 | 0.681 |
| PFNA | 9.91 | -60.65 | 80.47 | 15.87 | -58.42 | 90.16 | 0.912 |
| PFOS | -92.76 | -159.94 | -25.59 | -76.30 | -154.73 | 2.12 | 0.886 |
| PFUA | -100.48 | -165.23 | -35.72 | 3.56 | -75.76 | 82.87 | 0.043 |
| Mixture | -122.69 | -226.74 | -18.64 | -82.03 | -217.36 | 53.29 | 0.465 |
| *rs2236225* | GG genotype | | | Other genotypes | | |  |
| PFOA | -45.51 | -112.45 | 21.42 | 1.98 | -74.01 | 77.97 | 0.324 |
| PFNA | 46.01 | -17.83 | 109.85 | -20.96 | -102.29 | 60.36 | 0.143 |
| PFOS | -116.42 | -183.62 | -49.23 | -47.36 | -120.15 | 25.44 | 0.172 |
| PFUA | -29.69 | -94.28 | 34.90 | -115.17 | -192.05 | -38.30 | 0.073 |
| Mixture | -82.80 | -182.86 | 17.26 | -126.42 | -239.18 | -13.67 | 0.307 |
| *rs1805087* | AA genotype | | | Other genotypes | | |  |
| PFOA | -0.73 | -56.39 | 54.92 | -124.05 | -248.01 | -0.09 | 0.113 |
| PFNA | 35.44 | -18.15 | 89.03 | -71.01 | -214.52 | 72.50 | 0.135 |
| PFOS | -70.43 | -123.28 | -17.58 | -191.89 | -344.18 | -39.61 | 0.046 |
| PFUA | -44.12 | -97.49 | 9.25 | -145.05 | -281.18 | -8.92 | 0.232 |
| Mixture | -62.66 | -145.96 | 20.63 | -244.89 | -503.69 | 13.92 | 0.058 |
| *rs1801394* | AA genotype | | | Other genotypes | | |  |
| PFOA | -11.06 | -84.32 | 62.20 | -20.47 | -89.34 | 48.39 | 0.579 |
| PFNA | 12.85 | -57.49 | 83.19 | 18.20 | -50.49 | 86.90 | 0.822 |
| PFOS | -76.41 | -141.85 | -10.96 | -110.99 | -187.19 | -34.79 | 0.611 |
| PFUA | -90.94 | -163.06 | -18.83 | -54.02 | -121.63 | 13.60 | 0.513 |
| Mixture | -98.73 | -209.67 | 12.22 | -68.01 | -175.05 | 39.04 | 0.810 |
| *rs234714* | CC genotype | | | Other genotypes | | |  |
| PFOA | -56.23 | -135.41 | 22.94 | 7.09 | -57.99 | 72.17 | 0.359 |
| PFNA | 22.09 | -55.03 | 99.20 | 22.74 | -42.12 | 87.60 | 0.808 |
| PFOS | -119.02 | -195.00 | -43.04 | -50.97 | -117.59 | 15.65 | 0.121 |
| PFUA | -81.29 | -160.10 | -2.48 | -38.73 | -101.60 | 24.13 | 0.311 |
| Mixture | -132.28 | -265.27 | 0.71 | -18.63 | -117.17 | 79.91 | 0.307 |
| *rs10830963* | CC genotype | | | Other genotypes | | |  |
| PFOA | 7.96 | -146.98 | 162.89 | -30.63 | -85.20 | 23.94 | 0.695 |
| PFNA | 142.38 | -6.07 | 290.82 | -6.81 | -60.41 | 46.79 | 0.030 |
| PFOS | -154.79 | -337.79 | 28.20 | -79.67 | -131.24 | -28.10 | 0.714 |
| PFUA | 11.44 | -131.73 | 154.62 | -73.07 | -127.28 | -18.85 | 0.178 |
| Mixture | -5.34 | -269.71 | 259.03 | -116.81 | -208.59 | -25.02 | 0.180 |
| *rs1351394* | CC genotype | | | Other genotypes | | |  |
| PFOA | -18.12 | -73.24 | 37.01 | -44.99 | -171.06 | 81.09 | 0.584 |
| PFNA | 26.94 | -25.14 | 79.02 | -67.57 | -220.04 | 84.90 | 0.257 |
| PFOS | -100.28 | -152.38 | -48.18 | -70.86 | -218.97 | 77.24 | 0.345 |
| PFUA | -37.59 | -89.97 | 14.79 | -177.66 | -323.13 | -32.18 | 0.102 |
| Mixture | -89.03 | -164.55 | -13.50 | -286.36 | -538.32 | -34.40 | 0.543 |
| *rs1042725* | TT genotype | | | Other genotypes | | |  |
| PFOA | -26.48 | -86.29 | 33.32 | -33.54 | -128.20 | 61.11 | 0.948 |
| PFNA | 25.51 | -31.04 | 82.07 | -34.75 | -137.51 | 68.01 | 0.417 |
| PFOS | -108.88 | -165.14 | -52.62 | -58.64 | -162.60 | 45.32 | 0.176 |
| PFUA | -35.57 | -92.97 | 21.83 | -96.26 | -195.94 | 3.42 | 0.275 |
| Mixture | -101.74 | -203.35 | -0.13 | -155.78 | -317.68 | 6.12 | 0.937 |
| a. The concentrations were log-transformed and scaled with mean of 0 and standard deviation of 1. Adjusted for maternal age (> 35 years old or not), education (college or above versus others), family income (higher or lower than the average income), environmental tobacco smoke exposure (yes or no), parity, BMI trajectories (underweight, normal, overweight or obesity), and fish intake. | | | | | | | |

| **Table S7** *Associations of PFAS concentrations and head circumference, stratified by selected genotypes* | | | | | | | |
| --- | --- | --- | --- | --- | --- | --- | --- |
|  | **Estimate** | **95% confidence interval** | | **Estimate** | **95% confidence interval** | | **P-for-interaction** |
| *rs1801133* | GG genotype | | | Other genotypes | | |  |
| PFOA | -0.06 | -0.30 | 0.19 | 0.10 | -0.15 | 0.36 | 0.501 |
| PFNA | -0.06 | -0.30 | 0.19 | 0.24 | -0.01 | 0.48 | 0.084 |
| PFOS | -0.31 | -0.54 | -0.07 | -0.12 | -0.39 | 0.15 | 0.365 |
| PFUA | -0.25 | -0.48 | -0.02 | 0.02 | -0.24 | 0.29 | 0.078 |
| Mixture | -0.35 | -0.76 | 0.05 | 0.13 | -0.33 | 0.60 | 0.101 |
| *rs2236225* | GG genotype | | | Other genotypes | | |  |
| PFOA | -0.04 | -0.27 | 0.18 | 0.04 | -0.22 | 0.29 | 0.550 |
| PFNA | 0.16 | -0.06 | 0.38 | -0.02 | -0.30 | 0.25 | 0.190 |
| PFOS | -0.30 | -0.54 | -0.07 | -0.19 | -0.43 | 0.05 | 0.571 |
| PFUA | -0.12 | -0.34 | 0.10 | -0.17 | -0.44 | 0.10 | 0.572 |
| Mixture | -0.06 | -0.41 | 0.29 | -0.30 | -0.77 | 0.18 | 0.363 |
| *rs1805087* | AA genotype | | | Other genotypes | | |  |
| PFOA | -0.01 | -0.21 | 0.18 | 0.07 | -0.37 | 0.51 | 0.625 |
| PFNA | 0.08 | -0.10 | 0.27 | 0.12 | -0.37 | 0.62 | 0.848 |
| PFOS | -0.21 | -0.40 | -0.03 | -0.39 | -0.93 | 0.15 | 0.270 |
| PFUA | -0.13 | -0.32 | 0.05 | -0.09 | -0.57 | 0.39 | 0.702 |
| Mixture | -0.21 | -0.56 | 0.14 | 0.07 | -0.77 | 0.91 | 0.520 |
| *rs1801394* | AA genotype | | | Other genotypes | | |  |
| PFOA | 0.06 | -0.20 | 0.32 | -0.01 | -0.25 | 0.23 | 0.725 |
| PFNA | 0.00 | -0.25 | 0.25 | 0.18 | -0.06 | 0.42 | 0.276 |
| PFOS | -0.22 | -0.46 | 0.01 | -0.34 | -0.61 | -0.07 | 0.510 |
| PFUA | -0.24 | -0.49 | 0.02 | -0.09 | -0.32 | 0.15 | 0.492 |
| Mixture | -0.22 | -0.67 | 0.24 | -0.05 | -0.45 | 0.34 | 0.643 |
| *rs234714* | CC genotype | | | Other genotypes | | |  |
| PFOA | -0.03 | -0.32 | 0.26 | 0.03 | -0.18 | 0.24 | 0.815 |
| PFNA | 0.15 | -0.13 | 0.43 | 0.07 | -0.14 | 0.29 | 0.795 |
| PFOS | -0.32 | -0.61 | -0.04 | -0.22 | -0.43 | 0.00 | 0.656 |
| PFUA | -0.25 | -0.54 | 0.04 | -0.02 | -0.23 | 0.18 | 0.179 |
| Mixture | -0.18 | -0.69 | 0.33 | -0.03 | -0.45 | 0.38 | 0.873 |
| *rs10830963* | CC genotype | | | Other genotypes | | |  |
| PFOA | 0.03 | -0.52 | 0.58 | 0.00 | -0.19 | 0.19 | 0.844 |
| PFNA | 0.42 | -0.12 | 0.95 | 0.03 | -0.15 | 0.22 | 0.182 |
| PFOS | -0.40 | -1.06 | 0.26 | -0.23 | -0.41 | -0.05 | 0.936 |
| PFUA | 0.14 | -0.37 | 0.65 | -0.15 | -0.34 | 0.04 | 0.331 |
| Mixture | -0.04 | -1.18 | 1.09 | -0.16 | -0.51 | 0.18 | 0.536 |
| *rs1351394* | CC genotype | | | Other genotypes | | |  |
| PFOA | 0.03 | -0.17 | 0.23 | -0.06 | -0.42 | 0.30 | 0.522 |
| PFNA | 0.11 | -0.08 | 0.30 | -0.05 | -0.48 | 0.39 | 0.554 |
| PFOS | -0.27 | -0.46 | -0.08 | -0.22 | -0.64 | 0.20 | 0.789 |
| PFUA | -0.10 | -0.29 | 0.09 | -0.13 | -0.56 | 0.31 | 0.812 |
| Mixture | -0.11 | -0.44 | 0.22 | -0.36 | -1.03 | 0.31 | 0.655 |
| *rs1042725* | TT genotype | | | Other genotypes | | |  |
| PFOA | 0.05 | -0.17 | 0.27 | -0.08 | -0.37 | 0.21 | 0.505 |
| PFNA | 0.12 | -0.09 | 0.33 | -0.01 | -0.32 | 0.31 | 0.594 |
| PFOS | -0.33 | -0.54 | -0.12 | -0.07 | -0.39 | 0.25 | 0.180 |
| PFUA | -0.07 | -0.28 | 0.14 | -0.23 | -0.54 | 0.07 | 0.404 |
| Mixture | -0.09 | -0.46 | 0.27 | -0.33 | -0.82 | 0.17 | 0.718 |
| a. The concentrations were log-transformed and scaled with mean of 0 and standard deviation of 1. Adjusted for maternal age (> 35 years old or not), education (college or above versus others), family income (higher or lower than the average income), environmental tobacco smoke exposure (yes or no), parity, BMI trajectories (underweight, normal, overweight or obesity), and fish intake. | | | | | | | |

| **Table S8** Unadjusted and adjusted associations of PFAS concentrations with birth weight and head circumference, additionally adjusted for vitamin use a | | | | | | | | |
| --- | --- | --- | --- | --- | --- | --- | --- | --- |
|  | **Unadjusted** | | | | **Adjusted** | | | |
|  | **Estimate** | **95% confidence interval** | | **p-value** | **Estimate** | **95% confidence interval** | | **p-value** |
| *Birth weight (g)* | | | | | | | | |
| PFOA | -25.05 | -75.39 | 25.29 | 0.330 | -26.21 | -77.24 | 24.83 | 0.315 |
| PFNA | 13.23 | -37.16 | 63.63 | 0.607 | 17.10 | -33.18 | 67.39 | 0.505 |
| PFOS | -75.02 | -124.79 | -25.25 | 0.003 | -81.32 | -131.92 | -30.73 | 0.002 |
| PFUA | -58.84 | -108.86 | -8.82 | 0.022 | -59.73 | -110.01 | -9.45 | 0.021 |
| Mixture | -84.78 | -167.06 | -2.50 | 0.044 | -87.05 | -160.62 | -13.48 | 0.021 |
| *Head circumference (cm)* | | | | | | | | |
| PFOA | 0.04 | -0.14 | 0.22 | 0.655 | -0.01 | -0.18 | 0.17 | 0.954 |
| PFNA | 0.05 | -0.13 | 0.23 | 0.565 | 0.08 | -0.09 | 0.26 | 0.338 |
| PFOS | -0.26 | -0.44 | -0.09 | 0.004 | -0.24 | -0.41 | -0.06 | 0.008 |
| PFUA | -0.14 | -0.31 | 0.04 | 0.134 | -0.13 | -0.30 | 0.05 | 0.158 |
| Mixture | -0.14 | -0.43 | 0.15 | 0.345 | -0.13 | -0.43 | 0.17 | 0.389 |
| a. The concentrations were log-transformed and scaled with mean of 0 and standard deviation of 1. | | | | | |  |  |  |
| b. Adjusted for maternal age (> 35 years old or not), education (college or above versus others), family income (higher or lower than the average income), environmental tobacco smoke exposure (yes or no), parity, BMI trajectories (underweight, normal, overweight or obesity), and vitamin supplementation during pregnancy. | | | | | | | | |

| **Table S9** *Associations of PFAS concentrations and birth weight with additional adjustment of vitamin use, stratified by selected genotypes* | | | | | | | |
| --- | --- | --- | --- | --- | --- | --- | --- |
|  | **Estimate** | **95% confidence interval** | | **Estimate** | **95% confidence interval** | | **P-for-interaction** |
| *rs1801133* | GG genotype | | | Other genotypes | | |  |
| PFOA | -37.86 | -107.55 | 31.83 | -10.98 | -88.35 | 66.39 | 0.653 |
| PFNA | 10.18 | -61.02 | 81.38 | 11.02 | -64.97 | 87.01 | 0.988 |
| PFOS | -88.69 | -156.58 | -20.80 | -70.04 | -151.02 | 10.94 | 0.892 |
| PFUA | -94.98 | -160.28 | -29.68 | -10.68 | -91.04 | 69.68 | 0.103 |
| Mixture | -116.41 | -215.15 | -17.66 | -86.43 | -228.84 | 55.98 | 0.566 |
| *rs2236225* | GG genotype | | | Other genotypes | | |  |
| PFOA | -44.85 | -113.37 | 23.67 | -0.63 | -76.54 | 75.28 | 0.366 |
| PFNA | 35.29 | -29.89 | 100.46 | -17.36 | -97.78 | 63.06 | 0.264 |
| PFOS | -102.79 | -171.85 | -33.74 | -44.67 | -118.54 | 29.20 | 0.247 |
| PFUA | -29.16 | -95.30 | 36.97 | -116.01 | -194.09 | -37.93 | 0.069 |
| Mixture | -86.73 | -191.70 | 18.25 | -126.41 | -255.99 | 3.17 | 0.366 |
| *rs1805087* | AA genotype | | | Other genotypes | | |  |
| PFOA | -0.10 | -56.45 | 56.25 | -121.54 | -247.05 | 3.98 | 0.081 |
| PFNA | 38.90 | -15.31 | 93.11 | -74.11 | -211.27 | 63.06 | 0.074 |
| PFOS | -59.30 | -113.43 | -5.17 | -191.06 | -343.05 | -39.07 | 0.026 |
| PFUA | -45.50 | -99.64 | 8.65 | -140.42 | -276.00 | -4.84 | 0.308 |
| Mixture | -51.71 | -129.11 | 25.69 | -250.38 | -478.11 | -22.65 | 0.027 |
| *rs1801394* | AA genotype | | | Other genotypes | | |  |
| PFOA | -14.65 | -88.36 | 59.06 | -23.37 | -93.04 | 46.30 | 0.542 |
| PFNA | 15.03 | -55.77 | 85.84 | 13.78 | -55.80 | 83.35 | 0.872 |
| PFOS | -65.52 | -131.91 | 0.87 | -113.19 | -190.28 | -36.09 | 0.514 |
| PFUA | -88.42 | -161.29 | -15.55 | -58.10 | -126.41 | 10.21 | 0.572 |
| Mixture | -83.24 | -205.83 | 39.34 | -78.64 | -191.70 | 34.42 | 0.975 |
| *rs234714* | CC genotype | | | Other genotypes | | |  |
| PFOA | -58.19 | -138.96 | 22.58 | 3.86 | -61.66 | 69.37 | 0.418 |
| PFNA | 17.94 | -60.71 | 96.59 | 21.88 | -43.47 | 87.24 | 0.805 |
| PFOS | -100.46 | -177.76 | -23.15 | -50.84 | -118.31 | 16.62 | 0.204 |
| PFUA | -83.49 | -163.99 | -2.99 | -39.75 | -103.17 | 23.67 | 0.343 |
| Mixture | -122.30 | -266.77 | 22.17 | -21.18 | -131.85 | 89.50 | 0.398 |
| *rs10830963* | CC genotype | | | Other genotypes | | |  |
| PFOA | 6.79 | -150.55 | 164.12 | -31.69 | -86.82 | 23.43 | 0.804 |
| PFNA | 136.78 | -15.14 | 288.71 | -6.13 | -60.32 | 48.07 | 0.042 |
| PFOS | -132.77 | -317.92 | 52.38 | -75.12 | -127.54 | -22.69 | 0.879 |
| PFUA | -0.78 | -146.61 | 145.04 | -70.95 | -125.90 | -16.00 | 0.245 |
| Mixture | -31.50 | -292.96 | 229.96 | -110.55 | -198.05 | -23.06 | 0.152 |
| *rs1351394* | CC genotype | | | Other genotypes | | |  |
| PFOA | -21.00 | -76.87 | 34.87 | -43.22 | -170.12 | 83.69 | 0.627 |
| PFNA | 25.73 | -27.15 | 78.61 | -67.70 | -222.72 | 87.33 | 0.269 |
| PFOS | -97.53 | -150.63 | -44.42 | -64.71 | -215.43 | 86.01 | 0.257 |
| PFUA | -36.22 | -89.57 | 17.13 | -182.77 | -325.10 | -40.44 | 0.059 |
| Mixture | -86.07 | -170.74 | -1.39 | -288.49 | -540.62 | -36.36 | 0.578 |
| *rs1042725* | TT genotype | | | Other genotypes | | |  |
| PFOA | -29.01 | -89.54 | 31.52 | -37.09 | -132.58 | 58.41 | 0.954 |
| PFNA | 25.03 | -32.29 | 82.36 | -40.54 | -144.35 | 63.27 | 0.385 |
| PFOS | -104.16 | -161.52 | -46.81 | -53.75 | -159.64 | 52.14 | 0.176 |
| PFUA | -36.62 | -94.91 | 21.66 | -99.58 | -200.15 | 1.00 | 0.247 |
| Mixture | -97.72 | -190.09 | -5.34 | -162.06 | -309.12 | -15.00 | 0.968 |
| a. The concentrations were log-transformed and scaled with mean of 0 and standard deviation of 1. Adjusted for maternal age (> 35 years old or not), education (college or above versus others), family income (higher or lower than the average income), environmental tobacco smoke exposure (yes or no), parity, BMI trajectories (underweight, normal, overweight or obesity), and vitamin supplementation during pregnancy. | | | | | | | |

| **Table S10** *Associations of PFAS concentrations and head circumference with additional adjustment of vitamin use, stratified by selected genotypes* | | | | | | | |
| --- | --- | --- | --- | --- | --- | --- | --- |
|  | **Estimate** | **95% confidence interval** | | **Estimate** | **95% confidence interval** | | **P-for-interaction** |
| *rs1801133* | GG genotype | | | Other genotypes | | |  |
| PFOA | -0.07 | -0.32 | 0.18 | 0.10 | -0.16 | 0.35 | 0.482 |
| PFNA | -0.05 | -0.30 | 0.20 | 0.23 | -0.02 | 0.48 | 0.106 |
| PFOS | -0.30 | -0.53 | -0.06 | -0.11 | -0.38 | 0.16 | 0.383 |
| PFUA | -0.23 | -0.46 | 0.00 | 0.00 | -0.26 | 0.27 | 0.146 |
| Mixture | -0.33 | -0.71 | 0.05 | 0.13 | -0.32 | 0.58 | 0.127 |
| *rs2236225* | GG genotype | | | Other genotypes | | |  |
| PFOA | -0.04 | -0.28 | 0.19 | 0.04 | -0.22 | 0.29 | 0.580 |
| PFNA | 0.12 | -0.10 | 0.34 | -0.03 | -0.31 | 0.24 | 0.293 |
| PFOS | -0.27 | -0.51 | -0.03 | -0.19 | -0.44 | 0.06 | 0.680 |
| PFUA | -0.12 | -0.34 | 0.11 | -0.16 | -0.43 | 0.11 | 0.536 |
| Mixture | -0.08 | -0.45 | 0.30 | -0.31 | -0.74 | 0.13 | 0.346 |
| *rs1805087* | AA genotype | | | Other genotypes | | |  |
| PFOA | -0.01 | -0.21 | 0.18 | 0.05 | -0.40 | 0.50 | 0.703 |
| PFNA | 0.09 | -0.10 | 0.28 | 0.04 | -0.44 | 0.52 | 0.976 |
| PFOS | -0.20 | -0.39 | -0.01 | -0.44 | -0.98 | 0.11 | 0.217 |
| PFUA | -0.14 | -0.33 | 0.05 | -0.06 | -0.55 | 0.43 | 0.615 |
| Mixture | -0.20 | -0.54 | 0.14 | -0.05 | -0.78 | 0.67 | 0.665 |
| *rs1801394* | AA genotype | | | Other genotypes | | |  |
| PFOA | 0.06 | -0.20 | 0.32 | -0.01 | -0.25 | 0.23 | 0.679 |
| PFNA | 0.00 | -0.25 | 0.25 | 0.17 | -0.06 | 0.41 | 0.289 |
| PFOS | -0.20 | -0.44 | 0.03 | -0.34 | -0.61 | -0.07 | 0.456 |
| PFUA | -0.24 | -0.50 | 0.02 | -0.09 | -0.33 | 0.15 | 0.527 |
| Mixture | -0.19 | -0.63 | 0.25 | -0.07 | -0.43 | 0.29 | 0.745 |
| *rs234714* | CC genotype | | | Other genotypes | | |  |
| PFOA | -0.04 | -0.34 | 0.26 | 0.03 | -0.19 | 0.24 | 0.867 |
| PFNA | 0.13 | -0.16 | 0.42 | 0.07 | -0.14 | 0.29 | 0.813 |
| PFOS | -0.26 | -0.54 | 0.03 | -0.22 | -0.44 | -0.01 | 0.813 |
| PFUA | -0.26 | -0.55 | 0.04 | -0.03 | -0.23 | 0.18 | 0.193 |
| Mixture | -0.14 | -0.68 | 0.39 | -0.04 | -0.39 | 0.31 | 0.921 |
| *rs10830963* | CC genotype | | | Other genotypes | | |  |
| PFOA | 0.03 | -0.53 | 0.59 | 0.00 | -0.19 | 0.19 | 0.767 |
| PFNA | 0.42 | -0.13 | 0.96 | 0.04 | -0.15 | 0.22 | 0.209 |
| PFOS | -0.33 | -0.99 | 0.34 | -0.22 | -0.40 | -0.04 | 0.954 |
| PFUA | 0.05 | -0.47 | 0.57 | -0.15 | -0.34 | 0.04 | 0.401 |
| Mixture | -0.14 | -1.22 | 0.95 | -0.15 | -0.49 | 0.19 | 0.625 |
| *rs1351394* | CC genotype | | | Other genotypes | | |  |
| PFOA | 0.03 | -0.18 | 0.23 | -0.05 | -0.41 | 0.31 | 0.549 |
| PFNA | 0.11 | -0.08 | 0.30 | -0.02 | -0.47 | 0.43 | 0.577 |
| PFOS | -0.26 | -0.46 | -0.07 | -0.21 | -0.64 | 0.22 | 0.697 |
| PFUA | -0.10 | -0.29 | 0.10 | -0.19 | -0.62 | 0.24 | 0.669 |
| Mixture | -0.10 | -0.49 | 0.28 | -0.38 | -1.06 | 0.30 | 0.677 |
| *rs1042725* | TT genotype | | | Other genotypes | | |  |
| PFOA | 0.04 | -0.18 | 0.26 | -0.10 | -0.39 | 0.20 | 0.498 |
| PFNA | 0.12 | -0.09 | 0.33 | -0.03 | -0.35 | 0.30 | 0.572 |
| PFOS | -0.32 | -0.54 | -0.11 | -0.06 | -0.39 | 0.27 | 0.178 |
| PFUA | -0.07 | -0.29 | 0.14 | -0.25 | -0.57 | 0.06 | 0.377 |
| Mixture | -0.09 | -0.46 | 0.29 | -0.36 | -0.76 | 0.04 | 0.691 |
| a. The concentrations were log-transformed and scaled with mean of 0 and standard deviation of 1. Adjusted for maternal age (> 35 years old or not), education (college or above versus others), family income (higher or lower than the average income), environmental tobacco smoke exposure (yes or no), parity, BMI trajectories (underweight, normal, overweight or obesity), and vitamin supplementation during pregnancy. | | | | | | | |
